1

2

3

4

5 **Modelling Speed-Accuracy Tradeoffs in the Stopping Rule for Confidence Judgments**

6

7

8 **Stef Herregods<sup>1</sup>, Pierre Le Denmat<sup>1</sup>, & Kobe Desender<sup>1</sup>**

9 1. Brain and Cognition, KU Leuven, Belgium

10

11

12

13 **Corresponding author:**

14 Prof. dr. Kobe Desender

15 Brain and Cognition

16 KU Leuven

17 Tiensestraat 102, 3000 Leuven

18 Belgium

19 **Abstract (232 words)**

20 Making a decision and reporting your confidence in the accuracy of that decision are  
21 thought to reflect a similar mechanism: the accumulation of evidence. Previous research has  
22 shown that choices and reaction times are well accounted for by a computational model  
23 assuming noisy accumulation of evidence until crossing a decision boundary (e.g., the drift  
24 diffusion model). Decision confidence can be derived from the amount of evidence following  
25 post-decision evidence accumulation. Currently, the stopping rule for post-decision evidence  
26 accumulation is underspecified. Inspired by recent neurophysiological evidence, we introduce  
27 additional confidence boundaries that determine the termination of post-decision evidence  
28 accumulation. If this conjecture is correct, it implies that confidence judgments should be  
29 subject to the same strategic considerations as the choice itself, i.e. a tradeoff between speed  
30 and accuracy. To test this prediction, we instructed participants to make fast or accurate  
31 decisions, and to give fast or carefully considered confidence judgments. Results show that  
32 our evidence accumulation model with additional confidence boundaries successfully  
33 captured the speed-accuracy tradeoffs seen in both decisions and confidence judgments. Most  
34 importantly, instructing participants to make fast versus accurate decisions influenced the  
35 decision boundaries, whereas instructing participants to make fast versus careful confidence  
36 judgments influenced the confidence boundaries. Our data show that the stopping rule for  
37 confidence judgments can be well understood within the context of evidence accumulation  
38 models, and that the computation of decision confidence is under strategic control.

39 *Keywords:* Confidence, decision-making, drift diffusion model, computational  
40 modeling

41

## Introduction

42 Human decision making is accompanied by a sense of confidence. Humans often  
43 report high confidence when they make correct decisions and low confidence when they  
44 make incorrect decisions (Fleming et al., 2010). Understanding the computational  
45 underpinnings of decision confidence is of high importance, given that humans use decision  
46 confidence to adapt subsequent behavior (Desender et al., 2018, 2019; Folke et al., 2016). In  
47 recent work, identifying the computational underpinnings of decision confidence has been  
48 identified as an important common goal for the field of metacognition (Rahnev et al., 2022).  
49 Given that decision confidence reflects an evaluation of the accuracy of a decision,  
50 computational accounts of decision confidence usually depart from decision making models  
51 and aim to explain the computation of confidence within these models.

52 In many decision making scenarios, human observers face the challenging task to  
53 make accurate decisions based on noisy evidence. Many theories of decision making assume  
54 that people solve this challenge by accumulating multiple pieces of evidence. Accumulation-  
55 to-bound models specifically propose that evidence is accumulated sequentially until the  
56 accumulated evidence reaches a predefined decision boundary. Once the decision boundary is  
57 reached, the model makes a choice (for review, see Gold & Shadlen, 2007). Within the drift  
58 diffusion model (DDM), evidence accumulates towards one of two opposite decision  
59 boundaries, with the additional assumption that evidence for both choice options is perfectly  
60 anti-correlated (Ratcliff & McKoon, 2008). In its most basic implementation, the DDM  
61 explains the dynamics of decision making using only three main parameters: a drift rate,  
62 reflecting the strength of the evidence accumulation process, a decision boundary, reflecting  
63 the degree of evidence required before a decision is made, and non-decision time, capturing  
64 non-decision related components. This simple tenet has proven to be a powerful framework  
65 that can account for a realm of behavioral and neurophysiological data. For example,

66 accumulation-to-bound signals such as described by the DDM have been observed in human  
67 (Donner et al., 2009; O’Connell et al., 2012) and primate (Gold & Shadlen, 2007)  
68 neurophysiology. Most prominently, the DDM can explain the tradeoff between speed and  
69 accuracy that characterizes all forms of speeded decision making (Bogacz et al., 2006;  
70 Bogacz, Wagenmakers, et al., 2010). When participants are instructed to make speeded  
71 versus accurate decisions, the DDM explains these data by changing the height of the  
72 decision boundary (although the selectivity of this effect has been debated; Rafiei & Rahnev,  
73 2021). Decreasing the decision boundary effectively lowers the required level of evidence  
74 before reaching it, promoting fast responses at the expense of accuracy. Given that  
75 participants are able to change the decision boundary based on instructions (amongst many  
76 other manipulations), it is believed that the height of the decision boundary is under voluntary  
77 strategic control (Balci et al., 2011; Bogacz, Hu, et al., 2010).

78         Given the success of the DDM in explaining decision making, several attempts have  
79 been made to explain decision confidence within these models. Capitalizing on the notion  
80 that the sense of confidence seems to arise *after* a decision has been made, Pleskac and  
81 Busemeyer (2010) proposed that the process of evidence accumulation does not terminate  
82 once a choice boundary has been crossed, but rather there is continued accumulation of (post-  
83 decision) evidence, which further informs decision confidence. If additional post-decision  
84 evidence confirms the initial decision, the model will produce a high confidence response. If  
85 additional post-decision evidence contradicts the initial decision, the model produces low  
86 confidence, or even changes its mind about the initial decision (Resulaj et al., 2009; Van Den  
87 Berg et al., 2016). Given that post-decision evidence is most likely to contradict initial  
88 decisions when these were incorrect, this account can explain why confidence is usually  
89 higher for correct than for incorrect decisions (Moran et al., 2015; Pleskac & Busemeyer,

90 2010), and why confidence better tracks accuracy when participants take more time to report  
91 confidence (Yu et al., 2015).

92 Previous modeling work mostly used this model to jointly explain choices, reaction  
93 times and decision confidence. Strikingly, much less attention has been devoted towards the  
94 speed with which confidence reports are provided. This is remarkable, given that confidence  
95 RTs are highly informative about the underlying computations (Moran et al., 2015). As a  
96 consequence, most of the abovementioned models use a too simplistic stopping rule for the  
97 post-decision evidence accumulation process. For example, typical DDM models with post-  
98 decision processing include an additional parameter which controls the duration of the post-  
99 decision processing time (i.e. the time between the choice and the confidence report;  
100 Hellmann et al., 2021; Pleskac & Busemeyer, 2010; Yu et al., 2015). Thus, in these models  
101 the stopping rule for confidence judgments is to stop accumulating post-decision evidence  
102 once a certain amount of time has passed. However, such a static implementation seems  
103 incompatible with the considerable variation in confidence RTs that is usually observed in  
104 empirical data. Indeed, under a strict interpretation, this account predicts that confidence  
105 judgments will always be provided after a fixed latency. Contrary to this, confidence RTs  
106 show the same right-skewed distributions as decision RTs. This critique also applies to a  
107 more recent proposal which quantified confidence as the maximal evidence accumulated by a  
108 leaky evidence accumulation process (Pereira et al., 2021, 2022). Although such an account  
109 explains confidence in detection tasks very well, it does not make any prediction regarding  
110 the stopping rule for confidence judgments (see also Balsdon et al., 2020).

111 Recent neurophysiological work suggests that the stopping rule for confidence  
112 judgments is very similar to the stopping rule for decisions (for recent review, see Desender  
113 et al., 2021). For example, Murphy and colleagues (2015) showed that both choices and error  
114 detection judgments were associated with a similar accumulation-to-bound signature over

115 parietal electrodes in human EEG recordings. In line with this observation, Moran and  
116 colleagues (2015) established a list of empirical patterns involving confidence RTs and  
117 showed that a model with continuous post-decision accumulation until reaching a slowly  
118 collapsing confidence boundary was able to account for all empirical patterns, where other  
119 models failed to explain some of them. The work from Moran et al. (2015) provides initial  
120 evidence for (collapsing) confidence boundaries as the stopping rule for confidence  
121 judgments. Importantly, as discussed previously, there is extensive evidence that choice  
122 boundaries are under strategic control. Consequently, if a similar accumulation-to-bound  
123 mechanism underlies the stopping rule for confidence judgments, it is predicted that the  
124 termination of post-decision evidence accumulation should be similarly under strategic  
125 control. Remarkably, although there are numerous studies that have investigated speed-  
126 accuracy tradeoffs in choice formation (for review, see Bogacz, Wagenmakers, et al., 2010),  
127 to our knowledge it has yet to be investigated whether similar tradeoffs can be observed in  
128 confidence formation, and if so whether these are best accounted for by changes in the  
129 confidence boundary controlling post-decision evidence termination. Therefore, in the current  
130 work we modeled the stopping rule for confidence judgments as an accumulation-to-bound  
131 mechanism (see Figure 1 for a visual description of the model and hypotheses). In two  
132 experiments (one with a binary and one with a 6-choice confidence report), we then  
133 investigated the following hypotheses: 1) the stopping rule for confidence judgments is well  
134 described by an accumulation-to-bound mechanism similar to that for the primary decision,  
135 2) participants can selectively modulate the height of the choice boundary and the height of  
136 the confidence boundary when instructed to do so via speed-accuracy tradeoff instructions.

137

138

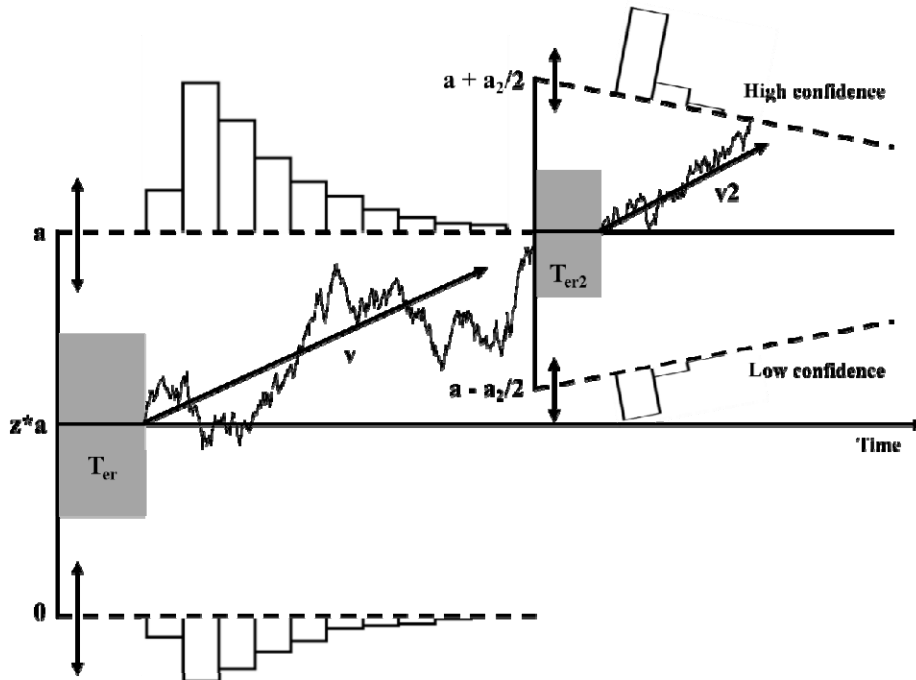

139 **Figure 1. Drift Diffusion Model (DDM) with additional Confidence Boundaries.** In the  
 140 classical DDM, evidence is assumed to accumulate (departing from starting point  $z \cdot a$ ) until  
 141 it reaches one of two opposing boundaries ( $a$  or  $0$ ). The strength of the accumulation process  
 142 is captured by the drift rate ( $v$ ). The decision boundaries are thought to be under strategic  
 143 control, and thus can be strategically increased or decreased (indicated by the arrows). To  
 144 explain decision confidence, the model continues to accumulate post-decision evidence, the  
 145 strength of which is controlled by the post-decision drift rate ( $v_2$ ). Note that the ratio between  
 146  $v$  and  $v_2$  has been coined  $v$ -ratio (Desender et al., 2022). The post-decision accumulation  
 147 process continues until it reaches one of two opposing confidence boundaries ( $a_2$  or  $-a_2$ ). The  
 148 reported level of confidence depends on the confidence boundary that was reached. Similar  
 149 to the choice boundaries, the height of these confidence boundaries are thought to be under  
 150 strategic control (indicated by the arrows). Non-decision related components are captured by  
 151  $T_{er}$  and  $T_{er2}$ . Note that confidence boundaries are allowed to slowly collapse over time  
 152 (controlled by an urgency parameter  $u$ ), to account for possible speed pressure on confidence  
 153 formation.

154 **Experiment 1**

155 **Methods and Materials**

156 ***Preregistration and Code***

157 All hypotheses, sample sizes, exclusion criteria for participants, analyzed variables,  
158 the experimental design and planned analyses were preregistered on the Open Science  
159 Framework (OSF) registries (<https://doi.org/10.17605/OSF.IO/Z2UCM>), unless specified as  
160 exploratory. Additionally, all code and data are made publicly available on GitHub  
161 (<https://github.com/StefHerregods/ConfidenceBounds>).

162 ***Participants***

163 We decided *a priori* to test a minimum of 40 viable participants, in line with previous  
164 speed-accuracy trade-off research (Desender et al., 2022). Participant recruitment continued  
165 until this sample size was met after applying exclusion criteria. In total, 51 participants took  
166 part in Experiment 1 in return for course credit. From the total dataset, one participant gave  
167 the same confidence rating in more than 95% of the trials and 10 participants required too  
168 many training trials or did not complete the experiment in time. Data from these participants  
169 was excluded from further analyses. The final dataset comprised 40 participants (36 female),  
170 with a mean age of 18.0 ( $SD = 0.6$ , range = 17-19). All participants had normal or corrected-  
171 to-normal vision, and signed informed consent before their participation. The experiment was  
172 approved by the local ethics committee.

173 ***Stimuli and Apparatus***

174 The experiment was programmed using Python v3.6.6 and PsychoPy (Peirce et al.,  
175 2019). Participants completed the experiment on 24-inch LCD screens using an AZERTY-  
176 keyboard, with blue stickers indicating buttons used for confidence judgments and red  
177 stickers indicating decision-making buttons.



178 ***Procedure***

179           Each experimental trial started with the display of a white fixation cross on a black  
180 background for 1s (see Figure 2). Instructions regarding the speed-accuracy regime were  
181 shown above and below the fixation cross for decision-making and confidence judgments,  
182 respectively. Depending on the block, the instructions were to either ‘Make fast decisions’ or  
183 ‘Make accurate decisions’, and to ‘Give fast confidence ratings’ or ‘Think carefully about  
184 your confidence ratings’, for choices and confidence reports, respectively. For convenience,  
185 we will refer to both type of instructions as choice SAT and confidence SAT, respectively.  
186 Next, a dynamic random dot motion stimulus was presented until participants gave a  
187 response. If participants did not provide a response within 5s, the message “Too slow, please  
188 respond faster” was shown on the screen. Motion coherence was controlled by the proportion  
189 of dots consistently moving towards the left versus right side of the screen. During the main  
190 experiment, three levels of coherence were used (.1, .2 and .4). Participants were instructed to  
191 press the ‘c’ or ‘n’ key with the thumbs of their left and right hand, to indicate whether they  
192 thought dots were moving towards the left or the right, respectively. If participants responded  
193 within 5s, they were subsequently asked about their level of confidence. The text ‘How  
194 confident are you that you made the correct choice?’ appeared on top of the screen, and  
195 participants pressed the ‘e’ or the ‘u’ key with their index fingers, mapped to high and low  
196 confidence, respectively (mapping counterbalanced across participants). Confidence  
197 judgments were transformed to numeric values, with ‘low confidence’ as zero and ‘high  
198 confidence’ as one.

199           The experiment started with three practice blocks (24 trials each). In block 1  
200 participants only made random dot motion decisions with a coherence of .5 for all trials.  
201 During this block they received immediate feedback about choice accuracy. Participants  
202 repeated block 1 until achieving average accuracy of 85% or more. Block 2 was identical

203 except that the same three coherence levels as in the main phase were used (.1, .2 and .4).  
204 Participants repeated block 2 until achieving average accuracy of 60% or more. In block 3,  
205 participants no longer received trial-by-trial feedback but instead were asked about their level  
206 of confidence after each trial. Afterwards, participants took part in twelve blocks of 60 trials  
207 each. In each block there was a similar number of coherent left and right dot motion trials,  
208 and an equal occurrence of the three coherence levels. Finally, each block had specific  
209 instructions about the speed-accuracy regime for decision-making and confidence judgments.  
210 These instructions appeared both before each block and at the start of each trial (i.e. during  
211 the fixation cross). Speed-accuracy regime instructions were constant within a block, but  
212 switched after each block. Each combination of instructions appeared three times, and the  
213 order of appearance was counterbalanced across participants using a Latin square. After each  
214 block, participants received feedback about their average accuracy, average reaction time and  
215 average confidence reaction time of the preceding block.

216

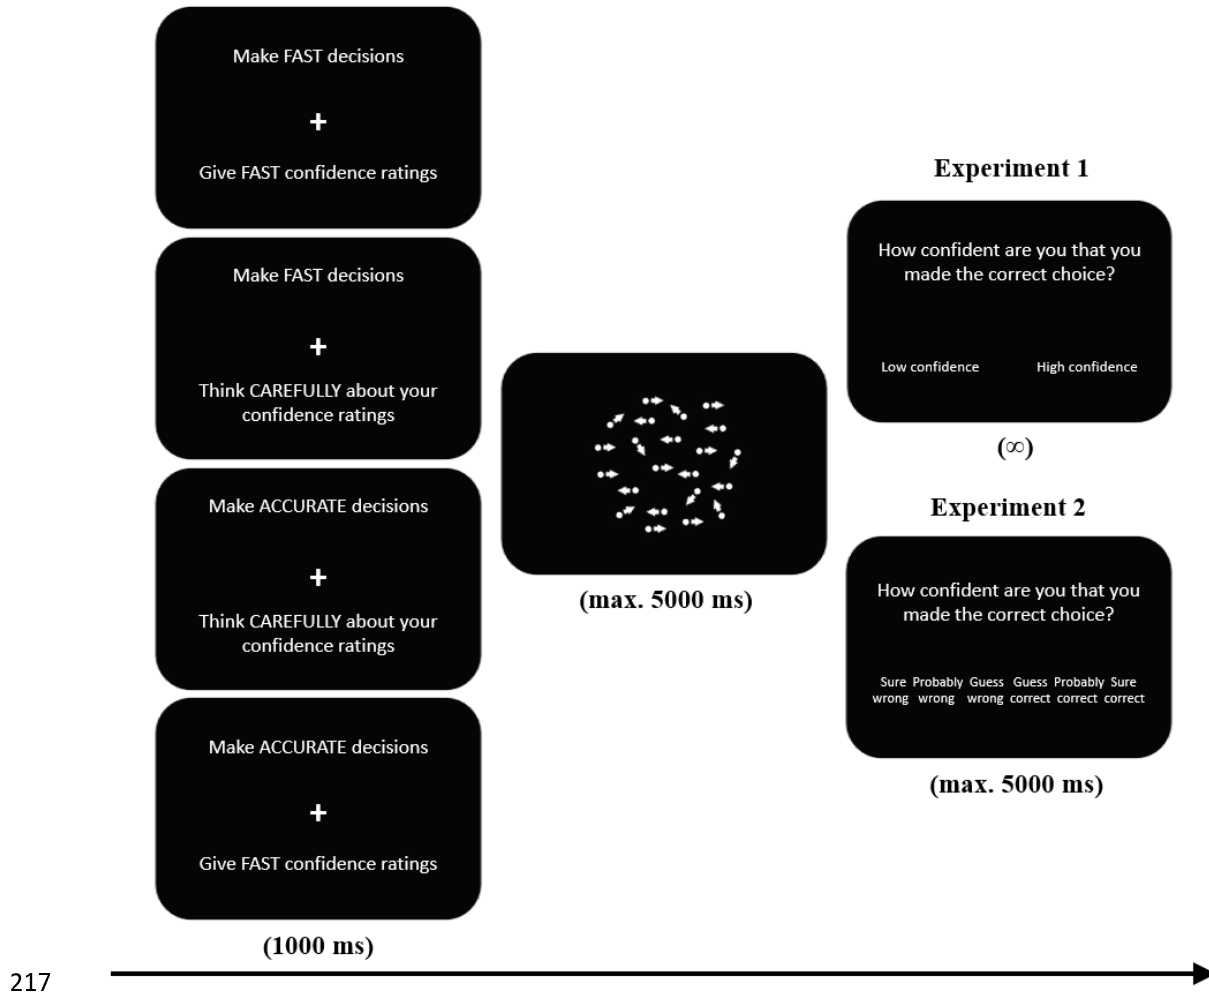

217

218

219 **Figure 2. Example of an experimental trial.** During presentation of the fixation cross

220 participants received specific instructions regarding the speed-accuracy regime for choices

221 (above fixation) and confidence (below fixation). These instructions were constant within a

222 block, but switched each block. Next, participants made binary choices about random dot

223 motion, and afterwards indicated their level of confidence on a two-point scale (Experiment

224 1), or a six-point scale (Experiment 2).

225

226

227 **Statistical analyses**

228 Reaction times on correct trials, accuracy, confidence judgments on correct trials and  
229 confidence RT's on correct trials were analyzed using mixed effects models. All models  
230 included at least a random intercept per participant, and all manipulations (choice SAT,  
231 confidence SAT and coherence) and their interactions as fixed effects, unless otherwise  
232 specified. These models were then extended with random slopes in order of biggest increase  
233 in BIC, until the addition of random slopes led to a non-significant increase in likelihood or  
234 until the random effects structure was too complex to be supported by the data (leading to an  
235 unstable fit). We used the lmer and glmer functions of the lme4 package (Bates et al., 2015)  
236 to fit the linear and generalized linear mixed models, respectively, in R (R Core Team, 2021).  
237 The calculation of  $p$  values is based on chi-square estimations using the Wald test from the  
238 car-package (Fox & Weinberg, 2019). Due to violations of the assumptions of normally  
239 distributed residuals and homoscedasticity, all RT's and confidence RT's were log  
240 transformed and mean-centered. Finally, the influence of the speed-accuracy manipulations  
241 on estimated model parameters was examined using a repeated measures ANOVA's and  
242 follow-up paired t-tests, as implemented in the rstatix package (Kassambara, 2021).

243 **Model Specification**

244 We simulated noisy evidence accumulation using a random walk approximation of  
245 the drift diffusion process (Tuerlinckx et al., 2001). A random walk process started at  $z*a$ ,  
246 with  $z$  being an unbiased starting point of .5, and continued to accumulate until the  
247 accumulated evidence reaches 0 or  $a$  (reflecting the height of the decision boundaries). At  
248 each time step  $\tau$  the accumulated evidence was updated with  $\Delta$ , with the update rule shown in  
249 equation (1):

$$\Delta = v * \tau + \sigma * \sqrt{\tau} * N(0,1) \quad (1)$$

250 with  $v$  reflecting the drift rate,  $N$  reflecting the standard normal distribution,  $\tau$   
251 reflecting precision, which was set to .001 in all simulations, and  $\sigma$  reflecting within-trial  
252 noise which was fixed to 1. Choice and RT are quantified at the moment of boundary  
253 crossing. An additional time  $ter$  is added to predicted RTs to capture non-decision-related  
254 processes. After the accumulated evidence reached 0 or  $a$ , evidence continued to accumulate  
255 at each time step  $\tau$  with displacement  $\Delta p$ , with the post-decision update rule shown in  
256 equation (2):

$$\Delta p = v_2 * \tau + \sigma * \sqrt{\tau} * N(0,1) \quad (2)$$

257 with  $v_2$  reflecting the drift rate governing post-decisional processing. Allowing  
258 dissociations between drift rate and post-decisional drift rate is necessary to account for  
259 differences in metacognitive accuracy (Desender et al., 2022). Post-decisional accumulation  
260 continued until the lower or upper confidence boundary was reached. The height of the  
261 confidence boundaries is given by equation (3):

$$\text{if}(\text{choice}=a) \text{ confidence boundary} = a \pm a_2 \pm u * t_2 \quad (3)$$

$$\text{if}(\text{choice}=0) \text{ confidence boundary} = 0 \pm a_2 \pm u * t_2$$

262 with  $a_2$  reflecting the height of the confidence boundaries,  $u$  reflecting the amount of  
263 linear urgency, and  $t_2$  reflecting post-decision time. The  $\pm$  sign indicates that this value  
264 should be added or subtracted depending on whether it reflects the upper or lower boundary.  
265 Finally, an additional time  $ter_2$  was added to predicted confidence RTs to capture non-  
266 confidence related processes (e.g. pressing a confidence button). In contrast to  $ter$ , which is  
267 by definition always positive, we also allowed  $ter_2$  to take negative values, to account for the  
268 possibility that post-decision evidence accumulation already starts before an overt response

269 has been made (e.g., during the motor execution of the first response). An overview of all  
270 parameters can be found in table 1.

271

272 ***Table 1. Parameters of the extended drift diffusion model.***

| <b>Parameter</b> | <b>Meaning</b>           | <b>Description</b>                                                                                              |
|------------------|--------------------------|-----------------------------------------------------------------------------------------------------------------|
| $v$              | Drift rate               | Average rate of evidence accumulation                                                                           |
| $\sigma$         | Drift coefficient        | Noise in the accumulation process, fixed to .1                                                                  |
| $a$              | Boundary                 | Determines the amount of evidence required before making a choice                                               |
| $ter, ter_2$     | Non-decision time        | Non-decision related components (e.g. motor execution)                                                          |
| $z$              | Starting point           | Determines the starting point of the accumulation process, fixed to .5.                                         |
| $v_2$            | Post-decision drift rate | Average rate of post-decision evidence accumulation                                                             |
| $a_2$            | Confidence boundary      | Determines the amount of evidence requires before making a confidence judgment                                  |
| $u$              | Urgency                  | Evidence-independent constant subtracted from the confidence boundary each time step (i.e. collapsing boundary) |

273

## 274 **Parameter Estimation and Model Fit**

275 We estimated best fitting parameters by minimizing an error function based on  
276 quantile optimization of the RT and confidence RT distributions. Quantiles were computed in  
277 observed and simulated data for (i) decision RT quantiles, separately for correct and error

278 trials, (ii) confidence RT quantiles, separately for correct and error trials, and (iii) confidence  
279 RT quantiles, separately for high and low confidence ratings. The resulting error function is  
280 shown in equation (4):

$$281 \quad \text{RSS} = 2 * \sum(oRT_{i,q} - sRT_{i,q})^2 + \sum(oRTconf_{i,q} - sRTconf_{i,q})^2 + \sum(oRTconf_{j,q} -$$
$$282 \quad \quad \quad sRTconf_{j,q})^2 \quad (4)$$

283 with *oRT* and *sRT* referring to observed and simulated RT proportions, and *oRTconf* and  
284 *sRTconf* referring to observed and simulated confidence RT proportions, across multiple  
285 quantiles (*q*) (.1, .3, .5, .7, and .9), for correct- and error-trials (*i*), and high- and low  
286 confidence trials (*j*) separately. We minimized the abovementioned error function using  
287 differential evolution optimization as operationalized in the DEoptim package, and by setting  
288 the amount of iterations to 1000 (Mullen et al., 2011). Model fitting was done separately per  
289 participant. To test model fits, we simulated choices, RTs, confidence and confidence RTs  
290 from the estimated parameters.

## 291 **Parameter Recovery**

292 Before estimating parameters based on empirical data, we performed parameter  
293 recovery to ensure that the extended DDM accurately recovers known parameters. For this  
294 end, we simulated data for  $N = 40$  synthetic participants, once with  $N_{\text{trials}} = 10,000$  (i.e.,  
295 simulating an ideal scenario) and once with  $N_{\text{trials}} = 180$  (i.e. the number of trials per cell in  
296 our design). Parameters were randomly sampled from a uniform distribution with the  
297 minimum and maximum values chosen such that they were in line with the empirically  
298 observed fits;  $a = [.5, 3]$ ,  $a_2 = [.5, 5]$ ,  $u = [0, 3]$ ,  $v = [0, 3]$ ,  $ter = [0, 1]$ ,  $ter_2 = [-.5, .5]$ ,  $v_2 = [0,$   
299  $7]$ . Subsequently, we performed linear regression predicting the true parameter value by the  
300 estimated value. Inspection of the regression results revealed that with 10,000 trials all slopes  
301 were significant ( $ps < .002$ ) and close to 1, reflecting excellent recovery. The only exception

302 was the urgency parameter,  $u$ , which yielded a slope of .19. Given the low recovery of this  
303 parameter, estimates of  $u$  should be interpreted with caution. Results did not drastically  
304 change when the parameter recovery was repeated with 180 trials. Full results of the  
305 parameter recovery for Experiment 1 can be found in table S1.

306

307

## Results

### 308 *Behavioral Analysis*

309 Trials with RTs below .2s were excluded from the dataset (00.40%) (Moran et al.,  
310 2015). In addition, confidence RTs slower than 5s were excluded (00.10%; note that choice  
311 RTs slower than 5s were excluded by design). Next, we report a set of analyses testing how  
312 RTs, confidence RTs, accuracy and confidence judgments were influenced by motion  
313 coherence (3 levels: .1, .2 and .4), choice SAT (2 levels: fast vs accurate) and confidence  
314 SAT (2 levels: fast vs careful).

315 For reaction times on correct trials (shown in Figure 3A), as expected we found a  
316 significant effect of choice SAT instructions,  $\chi^2(1) = 68.87$ ,  $p < .001$ , but not of confidence  
317 SAT instructions,  $\chi^2(1) = 0.56$ ,  $p = .455$ . Choice RTs were shorter when participants were  
318 instructed to respond fast ( $M = 0.92$ s) versus accurate ( $M = 1.38$ s). Also the main effect of  
319 motion coherence was significant,  $\chi^2(2) = 687.25$ ,  $p < .001$ , reflecting shorter RTs with  
320 increasing motion coherence. Additionally, we found a significant interaction between the  
321 choice SAT and confidence SAT,  $\chi^2(1) = 15.35$ ,  $p < .001$ , reflecting that the choice SAT  
322 effect was more expressed when participants were instructed to provide accurate versus  
323 careful confidence ratings. There was also a significant interaction between choice SAT and  
324 coherence,  $\chi^2(1) = 43.24$ ,  $p < .001$ , reflecting that the choice SAT effect was slightly larger  
325 for low coherence trials. All other effects were not significant,  $ps > .525$ . For accuracy, we



326 likewise found a significant effect of the choice SAT,  $\chi^2(1) = 8.25, p = .004$ , and coherence,  
327  $\chi^2(2) = 165.58, p < .001$ , but not of the confidence SAT,  $\chi^2(1) = 0.63, p = .429$ . As shown in  
328 Figure 3B, participants responded more correct when instructed to be accurate ( $M = 72.28\%$ )  
329 compared to when instructed to be fast ( $M = 70.78\%$ ), and accuracy increased with motion  
330 coherence. All other effects were not significant,  $ps > .071$ .

331 For confidence RTs on correct trials, we found significant effects of the confidence  
332 SAT instructions,  $\chi^2(1) = 77.06, p < .001$ , and coherence,  $\chi^2(2) = 14.29, p = .001$ . As  
333 expected, choice SAT instructions did not influence confidence RTs,  $\chi^2(1) = 0.42, p = .518$ .  
334 As can be seen in Figure 3C, confidence RTs were faster when participants were instructed to  
335 make fast ( $M = 0.31s$ ) vs careful ( $M = 0.73s$ ) confidence judgments. Additionally, we found a  
336 significant interaction between choice SAT and confidence SAT,  $\chi^2(1) = 6.28, p = .012$ ,  
337 reflecting a small spill-over from choice SAT into confidence RTs (mostly visible in the  
338 “accurate” condition). All other effects were not significant,  $ps > .464$ . Finally, for confidence  
339 judgments (see Figure 3D) we observed a significant main effect of coherence,  $\chi^2(2) =$   
340  $120.71, p < .001$ , reflecting that confidence increased with the proportion of motion  
341 coherence. There were no significant main effects of choice SAT,  $\chi^2(1) = 1.23, p = .267$ , nor  
342 confidence SAT,  $\chi^2(1) = 0.27, p = .606$ . There was only a small but significant interaction  
343 between choice SAT and confidence SAT,  $\chi^2(1) = 4.89, p = .027$ , reflecting that participants  
344 more often reported high confidence for fast ( $M = .64$ ) than for accurate ( $M = .61$ ) choices in  
345 the fast confidence condition, whereas there were was no such difference in the careful  
346 confidence condition (.62 vs .62, respectively). Finally, there was an interaction between  
347 choice SAT and coherence,  $\chi^2(2) = 9.97, p = .007$ , reflecting that the relation between  
348 confidence and coherence was slightly stronger in the accurate compared to the fast choice  
349 condition. All other effects were not significant,  $ps > .160$ .

350           Given that there was no effect of the SAT manipulations on average confidence, we  
351 additionally examined whether there was a difference in confidence resolution (i.e. the  
352 relation between confidence and accuracy). To do so, we computed type II ROC separately  
353 for each condition (ignoring coherence). Note that these analyses were not pre-registered. A  
354 2-way ANOVA on these estimates showed a main effect of confidence SAT,  $F(1,39) =$   
355  $15.42$ ,  $p < .001$ , but not from choice SAT,  $p = .599$ , nor was there an interaction,  $p = .491$ . As  
356 can be seen in Figure 4A, the relation between confidence and accuracy (expressed in AUC  
357 units) was higher when participants were instructed to make deliberate versus fast confidence  
358 ratings. Thus, although confidence did not strongly change on average, there was clear  
359 evidence in our data that confidence SAT did influence confidence resolution.

360

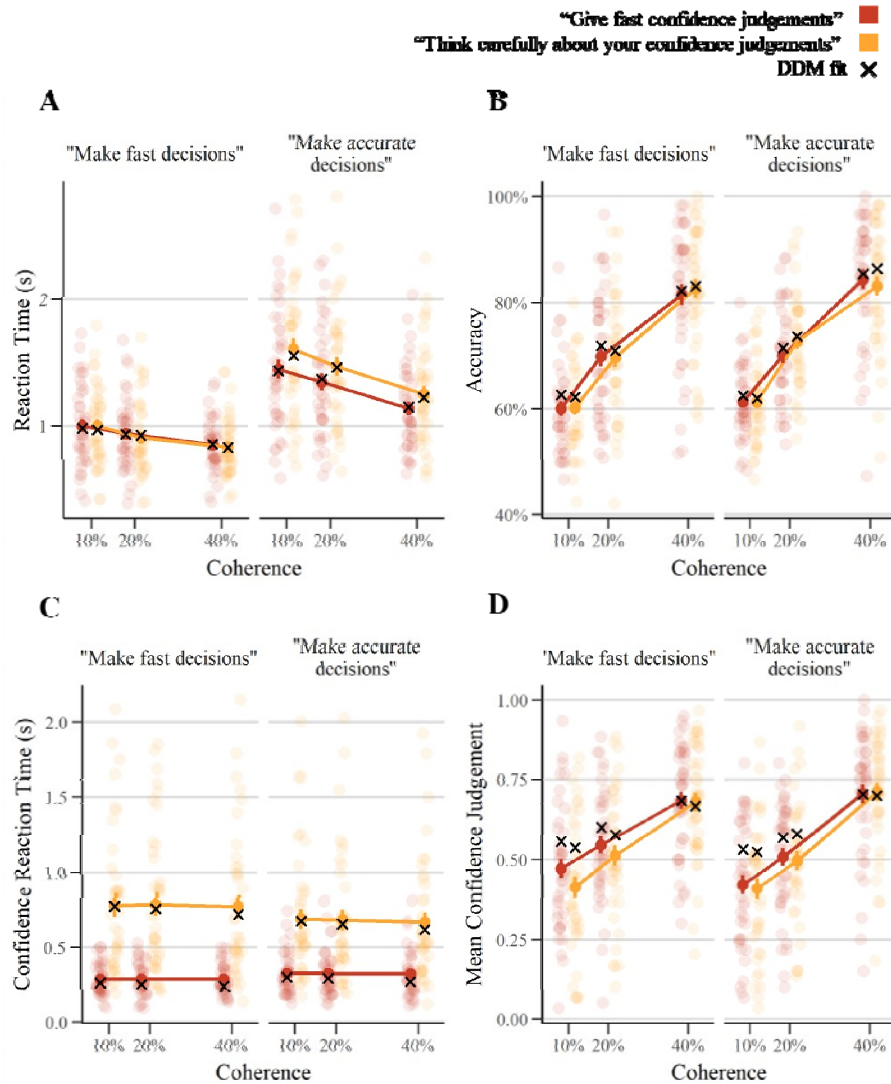

361

362 **Figure 3. The influence of choice SAT and confidence SAT on reaction times (A),**  
363 **accuracy (B), confidence RTs (C) and confidence (D) for Experiment 1. As expected, when**  
364 **participants were instructed to make fast versus accurate choices this led to fast versus slow**  
365 **choice RTs (A) and to a lesser extent to less and more accurate choices (B), respectively.**  
366 **When participants were instructed to make fast vs deliberate confidence judgments, this led**  
367 **to fast versus slow confidence RTs (C). The effects on confidence judgments (D) were**  
368 **pronounced. Note: error bars reflect SEM, transparent dots reflect means of individual**  
369 **participants, black crosses reflect extended DDM fits.**

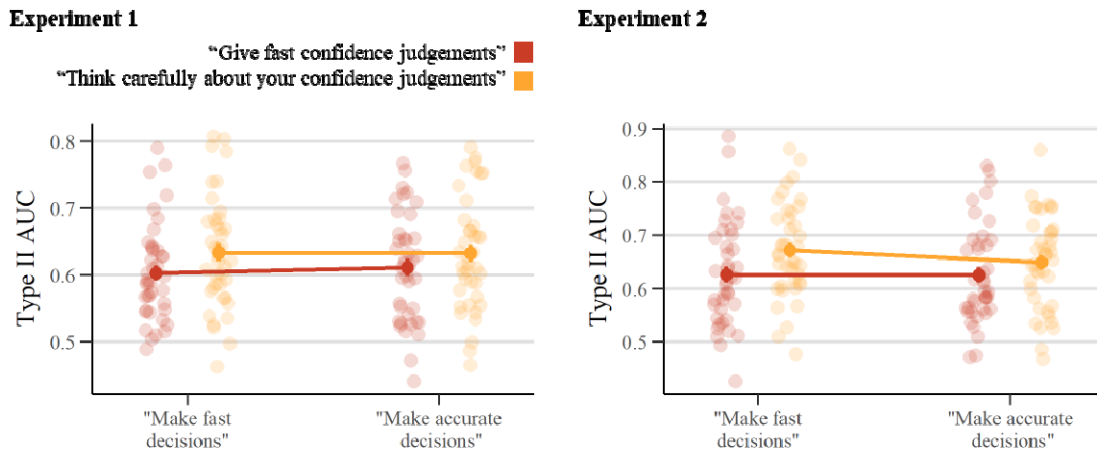

370 **Figure 4. Confidence resolution in Experiment 1 and Experiment 2, expressed as Type II**  
371 **AUC. Although confidence SAT instructions did not have a clear effect on average**  
372 **confidence, we did observe a clear effect on confidence resolution, which was not the case for**  
373 **choice SATs. Same conventions as in Figure 3.**

374

### 375 **Modeling speed-accuracy tradeoffs in choices and confidence**

376 Our modeling framework departed from the classical drift diffusion model (DDM), a  
377 popular evidence accumulation model that accounts well for choices and reaction times in  
378 perceptual decisions (Ratcliff & McKoon, 2008). To also account for confidence within the  
379 DDM, we allow the evidence to accumulate after it has reached a threshold (post-decision  
380 evidence accumulation; Pleskac & Busemeyer, 2010). Critically, post-decision evidence  
381 accumulation continues until the evidence reaches a second boundary. We will refer to this  
382 second boundary as the confidence boundary to dissociate it from the (first) decision  
383 boundary. Given that Experiment 1 only has two levels of confidence (high vs low),  
384 confidence here fully coincides with the boundary that was reached (i.e., high versus low  
385 confidence when reaching the upper vs lower confidence boundary; see Figure 1). In addition  
386 to a confidence boundary, we also allowed the height of the confidence boundaries to

387 collapse over time, an effect often referred to as urgency since it accounts for possible time-  
388 pressure effects.

### 389 *Model fit*

390 Having confirmed that our speed accuracy tradeoff instruction had the desired effect  
391 for both choices and for confidence judgments, we turned towards computational modeling of  
392 our data. Before looking at the estimated parameters, we first ensured that our model  
393 provided a good account of the decision process underlying the data, by examining whether it  
394 successfully captures both choices, RTs, confidence judgments and confidence RTs at the  
395 same time. In Figure 3, model predictions for RTs, choices, confidence and confidence RTs  
396 are plotted on top of the observed data. As can be seen, our model captured the trends in the  
397 data very well. This is further confirmed by analyzing model predictions (generated using the  
398 same number of trials as in the empirical data) in the same way as previously done with  
399 empirical data, which provided highly similar results. Most importantly, choice RTs and  
400 accuracy were both modulated by choice SAT instructions (RTs:  $\chi^2(1) = 63.52$ ,  $p < .001$ ;  
401 accuracy:  $\chi^2(1) = 5.30$ ,  $p = .021$ ), but not by confidence SAT instructions (RTs:  $p = .262$ ;  
402 accuracy:  $p = .388$ ). Reversely, confidence RTs and confidence were modulated by  
403 confidence SAT instructions (confidence RTs;  $\chi^2(1) = 71.75$ ,  $p < .001$ ; confidence:  $\chi^2(1) =$   
404  $5.15$ ,  $p = .023$ ), but not by choice SAT instructions (confidence RTs:  $p = .998$ ; confidence:  $p$   
405  $= .708$ ). Note that the main effect of confidence SAT instructions on confidence was not  
406 significant in the empirical data, reflecting a subtle but qualitative difference. We also note  
407 that the model slightly overestimates confidence for low coherence trials. The full results for  
408 the analysis of model predictions can be found in the Supplementary Materials, table S3.  
409 Finally, because the DDM aims to explain entire RT distributions, and not just summary  
410 statistics, we also inspected similarities between observed and simulated RT and confidence

411 RT distributions. As can be seen in Figure 5, the model captured the RT and confidence RT  
412 distributions very well across the different SAT manipulations.

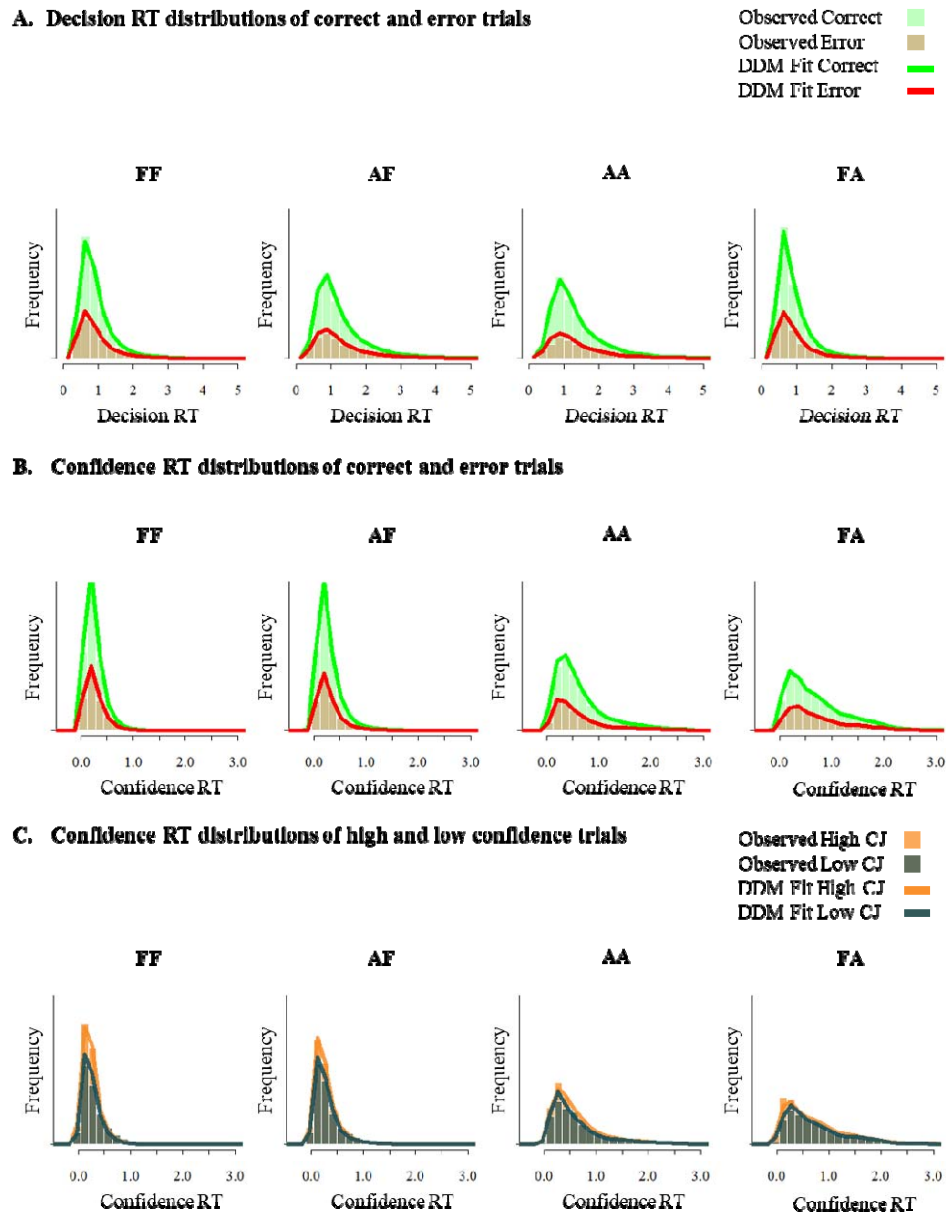

414 *Figure 5. Distributions of reaction times (A) and confidence RTs (B-C) for data and model*  
415 *fit for Experiment 1. Inspection of the model fit reveals that an extended DDM accurately*  
416 *captures the distributions in reaction times and confidence RTs seen in the data, across all*  
417 *four SAT manipulations. Note: AA, AF, FA and FF refer to SAT instructions to be*

418 *accurate/cautious (A) or fast (F) with the first index referring to the decision and the second*  
419 *index referring to confidence.*

#### 420 *Model parameters*

421 Having established that our model provides a good fit to the experimental data, we  
422 next turn towards the actual parameters. We hypothesized that SAT instructions for choices  
423 selectively affected choice boundaries, leaving confidence boundaries unaffected. Likewise,  
424 we expected SAT instructions about confidence to selectively affect confidence boundaries,  
425 leaving choice boundaries unaffected. These observations would support our hypothesis that  
426 indeed the stopping rule for both choices and choice confidence are under strategic control.

427 First, we used a repeated measures ANOVA to examine the influence of choice SAT  
428 (fast vs accurate), confidence SAT (fast vs careful), and their interaction on estimated  
429 decision boundaries. As expected, we found a strong and significant effect of the choice SAT,  
430  $F(1, 39) = 75.10, p < .001, \eta_p^2 = .66$ , but not of confidence SAT,  $F(1, 39) = 0.78, p = .384$ ,  
431  $\eta_p^2 = .02$ , nor was there an interaction,  $F(1, 39) = 2.82, p = .101, \eta_p^2 = .07$ . As can be seen in  
432 Figure 6A, when participants were asked to make fast decisions, the separation between both  
433 choice boundaries was smaller ( $M = 1.46$ ) compared to when they were asked to make  
434 accurate decisions ( $M = 1.96$ ).

435 Second, the same analysis on the estimated confidence boundaries revealed, as  
436 expected, a significant main effect of confidence SAT,  $F(1, 39) = 36.14, p < .001, \eta_p^2 = .48$ ,  
437 but not of choice SAT,  $F(1, 39) = 3.29, p = .078, \eta_p^2 = .08$ . There was, however, a significant  
438 interaction between both types of instruction,  $F(1, 39) = 9.20, p = .004, \eta_p^2 = .19$ . Paired t-  
439 tests showed that indeed confidence boundaries were higher when confidence SAT  
440 instructions were to make careful as opposed to fast confidence judgments, and this effect  
441 was slightly stronger when choice SAT focused on speed,  $t(39) = -6.45, p < .001$ , then when

442 it focused on accuracy,  $t(39) = -4.00$ ,  $p < .001$ , although it was highly significant in both  
443 cases (see Figure 6B). Choice SAT instructions did not influence confidence boundaries  
444 when confidence SAT instructed people to respond fast,  $t(39) = -0.45$ ,  $p = .658$ , but when  
445 confidence SAT instructed people to respond carefully, choice SAT seemed to influence  
446 estimated confidence boundaries,  $t(39) = 2.83$ ,  $p = .007$ .

447 Third, we looked at the influence of SAT instructions on estimated urgency  
448 parameters. There were no significant effect of the choice SAT,  $F(1, 39) = 1.88$ ,  $p = .179$ ,  $\eta_p^2$   
449  $= .05$ , nor of the confidence SAT,  $F(1, 39) = 0.002$ ,  $p = .967$ ,  $\eta_p^2 < 0.001$ , nor was there an  
450 interaction,  $F(1, 39) = 0.05$ ,  $p = .824$ ,  $\eta_p^2 = 0.001$ . Thus, it seems that confidence SAT  
451 instructions are implemented by changing the height of the confidence decision boundaries,  
452 while leaving urgency constant. In Figure 6C, two outliers with an urgency value higher than  
453 5 can be noticed. Removing these outliers from the analysis did not alter any of the  
454 conclusions.

455 Finally, as a sanity check we confirmed that estimated drift rates scaled with motion  
456 coherence using a repeated measures ANOVA,  $F(1.18, 45.98) = 108.304$ ,  $p < .001$ ,  $\eta_p^2 = .74$ .  
457 The other parameters were not allowed to vary, their mean estimates can be found in Table 2.



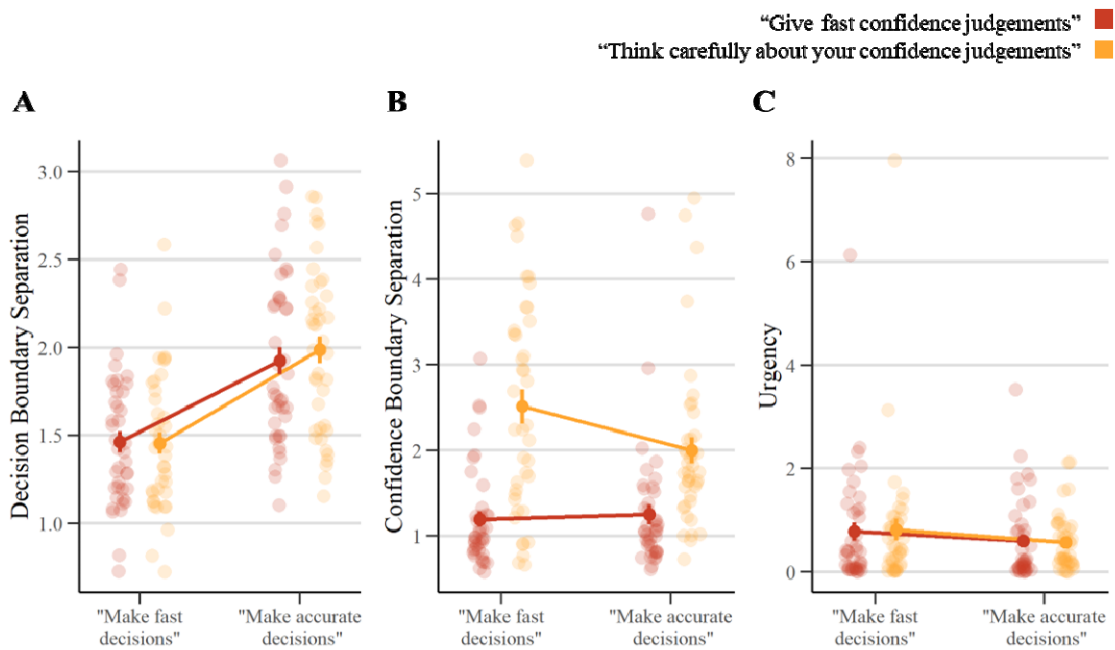

458

459 **Figure 6. Influence of choice SAT and confidence SAT on decision boundaries and**  
460 **confidence boundaries in Experiment 1. Instructing participants to make fast vs accuracy**  
461 **choices influences estimated decision boundaries (A), but rarely influences confidence**  
462 **boundaries or urgency (B-C). Instructing participants to provide fast vs careful confidence**  
463 **ratings influences estimated confidence boundaries (B), but does not affect decision bounds**  
464 **and urgency (A,C). Same conventions as in Figure 4.**

465

466 **Table 2. Mean (SD) Estimates for the Extended Drift Diffusion Model.** Note, AA, AF, FA  
 467 and FF refer to SAT instructions to be accurate/cautious (A) or fast (F) with the first index  
 468 referring to the decision and the second index referring to confidence.

| <b>Experiment 1</b>                                   |              |              |              |              |
|-------------------------------------------------------|--------------|--------------|--------------|--------------|
| Parameter                                             | AA           | AF           | FA           | FF           |
| <i>a</i>                                              | 1.99 (0.48)  | 1.92 (0.49)  | 1.46 (0.39)  | 1.46 (0.38)  |
| <i>v</i> <sub>1</sub> (coherence = 0.1)               | 0.26 (0.15)  | 0.27 (0.15)  | 0.34 (0.26)  | 0.36 (0.27)  |
| <i>v</i> <sub>2</sub> (coherence = 0.2)               | 0.56 (0.31)  | 0.51 (0.27)  | 0.65 (0.39)  | 0.68 (0.41)  |
| <i>v</i> <sub>3</sub> (coherence = 0.4)               | 1.12 (0.64)  | 1.17 (0.68)  | 1.31 (0.68)  | 1.27 (0.70)  |
| <i>ter</i>                                            | 0.51 (0.25)  | 0.44 (0.17)  | 0.39 (0.13)  | 0.41 (0.14)  |
| <i>ter</i> <sub>2</sub>                               | 0.08 (0.20)  | 0.04 (0.08)  | 0.05 (0.30)  | 0.05 (0.09)  |
| <i>v</i> -ratio (= <i>v</i> <sub>2</sub> / <i>v</i> ) | 1.32 (1.73)  | 2.02 (2.19)  | 0.97 (1.27)  | 1.78 (1.76)  |
| <i>a</i> <sub>2</sub>                                 | 2.00 (0.97)  | 1.25 (0.73)  | 2.51 (1.28)  | 1.20 (0.57)  |
| <i>u</i>                                              | 0.57 (0.55)  | 0.59 (0.79)  | 0.82 (1.31)  | 0.78 (1.13)  |
| <b>Experiment 2</b>                                   |              |              |              |              |
| <i>a</i>                                              | 2.11 (0.46)  | 1.81 (0.41)  | 1.55 (0.39)  | 1.41 (0.30)  |
| <i>v</i> <sub>1</sub> (coherence = 0.1)               | 0.30 (0.19)  | 0.36 (0.23)  | 0.36 (0.24)  | 0.34 (0.22)  |
| <i>v</i> <sub>2</sub> (coherence = 0.2)               | 0.60 (0.39)  | 0.58 (0.31)  | 0.70 (0.38)  | 0.70 (0.44)  |
| <i>v</i> <sub>3</sub> (coherence = 0.4)               | 1.18 (0.68)  | 1.08 (0.69)  | 1.33 (0.81)  | 1.32 (0.83)  |
| <i>ter</i>                                            | 0.52 (0.18)  | 0.50 (0.18)  | 0.42 (0.12)  | 0.43 (0.10)  |
| <i>ter</i> <sub>2</sub>                               | -0.53 (0.61) | -0.33 (0.42) | -0.76 (0.94) | -0.23 (0.38) |
| <i>v</i> -ratio (= <i>v</i> <sub>2</sub> / <i>v</i> ) | 1.05 (1.28)  | 1.66 (2.40)  | 1.25 (1.91)  | 1.40 (1.85)  |
| <i>a</i> <sub>2_upper</sub>                           | 3.76 (2.91)  | 3.30 (3.01)  | 4.22 (3.17)  | 2.63 (2.16)  |
| <i>a</i> <sub>2_lower</sub>                           | -5.47 (3.90) | -5.44 (3.46) | -5.87 (3.35) | -4.58 (3.58) |

|                |             |             |             |             |
|----------------|-------------|-------------|-------------|-------------|
| <i>u_upper</i> | 2.12 (1.65) | 3.95 (2.77) | 1.96 (1.64) | 3.22 (2.74) |
| <i>u_lower</i> | 2.69 (2.74) | 4.15 (3.30) | 2.67 (2.74) | 3.36 (3.26) |

---

469

470

### **Interim Summary**

471

In Experiment 1, participants were instructed to make fast or accurate decisions and to

472

make fast or careful confidence judgments, depending on the block they were in. At the

473

behavioral level, we observed that participants were indeed able to selectively speed up

474

choices or confidence judgments when instructed to do so. More importantly, model fits

475

using an extended DDM with additional confidence boundaries revealed that the mechanism

476

underlying such behavior was a change in the decision boundary for choices, and the

477

confidence boundary for confidence. Thus, these findings show that the stopping rule for

478

confidence judgments, just like the choice boundary for choices, is under voluntary strategic

479

control. One limitation of Experiment 1 is that participants were only allowed to give binary

480

confidence ratings (high or low). This design choice made for an easy modeling approach,

481

because it allows to directly map high and low confidence onto the upper and lower

482

confidence boundary, respectively. It is well known, however, that humans can provide more

483

fine-grained estimates of their performance. Thus, this begs the question whether our

484

extended DDM can also account for tasks with more fine-grained confidence scales. For this

485

end, in Experiment 2 we replicated Experiment 1, but now using a more fine-grained 6-

486

choice confidence scale.

487

488

## **Experiment 2**

489

### ***Methods and Materials***

490

#### ***Preregistration and Code***

491 The preregistration of this experiment can be found on OSF registries  
492 (<https://doi.org/10.17605/OSF.IO/VYH4K>), all code and data can be found on GitHub  
493 (<https://github.com/StefHerregods/ConfidenceBounds>).

#### 494 ***Participants***

495 A total of 54 participants participated in Experiment 2. Requirements and recruitment  
496 was identical to Experiment 1, with the additional criterium of not having participated in  
497 Experiment 1. Data of six participants were removed for not having an accuracy above  
498 chance level as assessed by a binomial test, and four participants for requiring more than  
499 seven training blocks. Finally, four participants did not finish the experiment in time. The  
500 final sample comprised 40 participants (33 female), with a mean age of 18.5 ( $SD = 1.3$ , range  
501 = 17 - 24).

#### 502 ***Stimuli and Apparatus***

503 Experiment 2 used the same apparatus and stimuli as in Experiment 1.

#### 504 ***Procedure***

505 The experiment was identical to Experiment 1, except for the following two  
506 exceptions: First, instead of a binary confidence rating, participants could choose between six  
507 options; ‘Sure wrong’, ‘Probably wrong’, ‘Guess wrong’, ‘Guess correct’, ‘Probably correct’  
508 and ‘Sure correct’, using the ‘1’, ‘2’, ‘3’, ‘8’, ‘9’ and ‘0’ keys on top of the keyboard. These  
509 six options were mapped onto a 1-6 confidence scale (counterbalanced between participants).  
510 Second, a time-limit of 5s was imposed on indicating confidence judgments, equal to the  
511 time-limit during decision-making. If a participant did not respond within this limit, they  
512 were instructed to respond faster in future trials with the following text: ‘Too slow... Please  
513 respond faster’.

#### 514 ***Model Specification and fit***

515           The modeling strategy was identical to Experiment 1 except for the following: we  
516 estimated separate parameters for upper and lower confidence boundary separation, and  
517 separate parameters for urgency of the upper and the lower boundary. This was done to allow  
518 the model to account for the negative relationship between confidence and confidence RTs  
519 (discussed in more detail below). In order for the model to be able to produce six levels of  
520 confidence, we changed the implementation such that confidence no longer corresponded to  
521 the confidence boundary that was reached (as in Experiment 1). Instead, confidence depended  
522 on the level of accumulated evidence at the time of reaching the confidence boundary. We  
523 evenly divided the space in between the two confidence boundaries into six categories, and  
524 the model produced a level of confidence between 1 and 6 depending on the state of the  
525 accumulated evidence.

## 526 **Parameter Recovery**

527           Because the extended DDM used in Experiment 2 differed in important aspects from  
528 Experiment 1, we repeated the parameter recovery exercise. The following minimum and  
529 maximum values were used:  $a = [.5, 3]$ ,  $a_{2\_upper} = [.1, 15]$ ,  $a_{2\_lower} = [.1, 15]$ ,  $u_{upper} = [0, 15]$ ,  
530  $u_{lower} = [0, 15]$ ,  $v = [0, 3]$ ,  $ter = [0, 1]$ ,  $ter_2 = [-.2, .2]$ ,  $v_2 = [0, 5]$ . Inspection of the regression  
531 analyses results revealed that with 10,000 trials all slopes were significant ( $ps < .001$ ), but the  
532 estimates were less close to 1 compared to Experiment 1. Given these results, particularly the  
533 estimate of  $v_2$  should be interpreted with caution. Results did not change drastically when the  
534 parameter recovery was repeated with only 180 trials. Full results of the parameter recovery  
535 for Experiment 2 can be found in table S2.

## 536 **Results**

### 537 ***Behavioral Analysis: Mixed Effects Modelling***

538 Data were analyzed in the same way as described in Experiment 1. Similar to  
539 Experiment 1, trials with a decision time of less than 0.2 s were excluded (0.30%). A mixed  
540 effects model on decision RTs on correct trials showed a significant effect of choice SAT,  
541  $\chi^2(1) = 57.91, p < .001$ , and coherence,  $\chi^2(2) = 956.89, p < .001$ . Unexpectedly, there also was  
542 a significant effect of confidence SAT,  $\chi^2(1) = 34.02, p < .001$ . Additionally, we found  
543 significant interactions between the choice SAT and confidence SAT,  $\chi^2(1) = 8.72, p = .003$ ,  
544 between coherence and choice SAT,  $\chi^2(2) = 21.80, p < .001$ , and between coherence and  
545 confidence SAT,  $\chi^2(2) = 12.10, p = .002$ . The three-way interaction between choice SAT,  
546 confidence SAT and coherence was not significant,  $\chi^2(2) = 0.65, p = .722$ . As can be seen in  
547 Figure 7A, choice RTs were shorter when participants were instructed to respond fast ( $M =$   
548 0.93s) versus accurate ( $M = 1.34$ s), however the effect was not as selective as in Experiment  
549 1, because choice RTs were also shorter when participants were instructed to provide fast ( $M$   
550 = 1.06s) versus careful confidence ratings ( $M = 1.20$ s). The same analysis on accuracy  
551 likewise showed significant main effects of choice SAT,  $\chi^2(1) = 6.05, p = .014$ , confidence  
552 SAT,  $\chi^2(1) = 4.76, p = .029$ , and coherence  $\chi^2(2) = 1202.14, p < .001$  (see Figure 7B).  
553 Accuracy was lower when participants were instructed to make fast ( $M = 73\%$ ) compared to  
554 accurate choices ( $M = 75\%$ ), and likewise when participants were instructed to make fast ( $M$   
555 = 74%) versus careful confidence ratings ( $M = 75\%$ ). All other effects were not significant,  
556  $ps > .257$ .

557 The same analysis on confidence RTs on correct trials, showed significant main  
558 effects of confidence SAT,  $\chi^2(1) = 85.62, p < .001$ , and coherence,  $\chi^2(2) = 71.12, p < .001$ .  
559 Unexpectedly, there was also a significant main effect of choice SAT,  $\chi^2(1) = 9.64, p = .002$ .  
560 Finally, the interaction between the confidence SAT and coherence was significant,  $\chi^2(2) =$   
561 6.26,  $p = .044$ . All other effects were not significant,  $ps > .161$ . As can be seen in Figure 7C,  
562 although confidence SAT clearly affected confidence RTs in the expected way, the effect was

563 not as selective as in Experiment 1. Confidence RTs were shorter when participants were  
564 instructed to make fast ( $M = .39s$ ) versus careful ( $M = .76s$ ) confidence ratings, and  
565 counterintuitively confidence RTs were slightly longer when participants were instructed to  
566 make fast ( $M = .62s$ ) versus accurate ( $M = .53s$ ) decisions.

567 Finally, the same analysis was carried out on confidence for correct trials. Note that  
568 for this analysis, the three-way interaction and the interaction between the choice SAT and  
569 confidence SAT were excluded because they caused variance inflation factors higher than 10.  
570 In the final model, there was a significant main effect of coherence,  $\chi^2(2) = 100.06, p < .001$ ,  
571 and the confidence SAT,  $\chi^2(1) = 4.36, p = .037$ , but not of the choice SAT,  $\chi^2(1) = 0.84, p =$   
572  $.359$ . As can be seen in Figure 7D, variations in confidence were mostly driven by coherence,  
573 but confidence was also slightly lower when participants were instructed to make fast ( $M =$   
574  $4.54$ ) versus careful ( $M = 4.84$ ) confidence judgments. Finally, we found a significant  
575 interaction between the confidence SAT and coherence,  $\chi^2(2) = 22.10, p < .001$ , reflecting  
576 that the confidence SAT was more pronounced on low coherence trials. The interaction  
577 between the choice SAT and coherence was found to be not significant,  $\chi^2(2) = 1.57, p =$   
578  $.455$ .

579 Similar to Experiment 1, in a non-preregistered analysis we additionally looked at  
580 confidence resolution by calculating type II AUC separately for each condition. Again, a 2-  
581 way ANOVA showed a main effect of confidence SAT,  $F(1,39) = 14.49, p < .001$ , but not  
582 from choice SAT,  $p = .066$ , nor was there an interaction,  $p = .125$ . As can be seen in Figure  
583 4B, the relation between confidence and accuracy (expressed in AUC units) was higher when  
584 participants were instructed to make careful vs fast confidence ratings

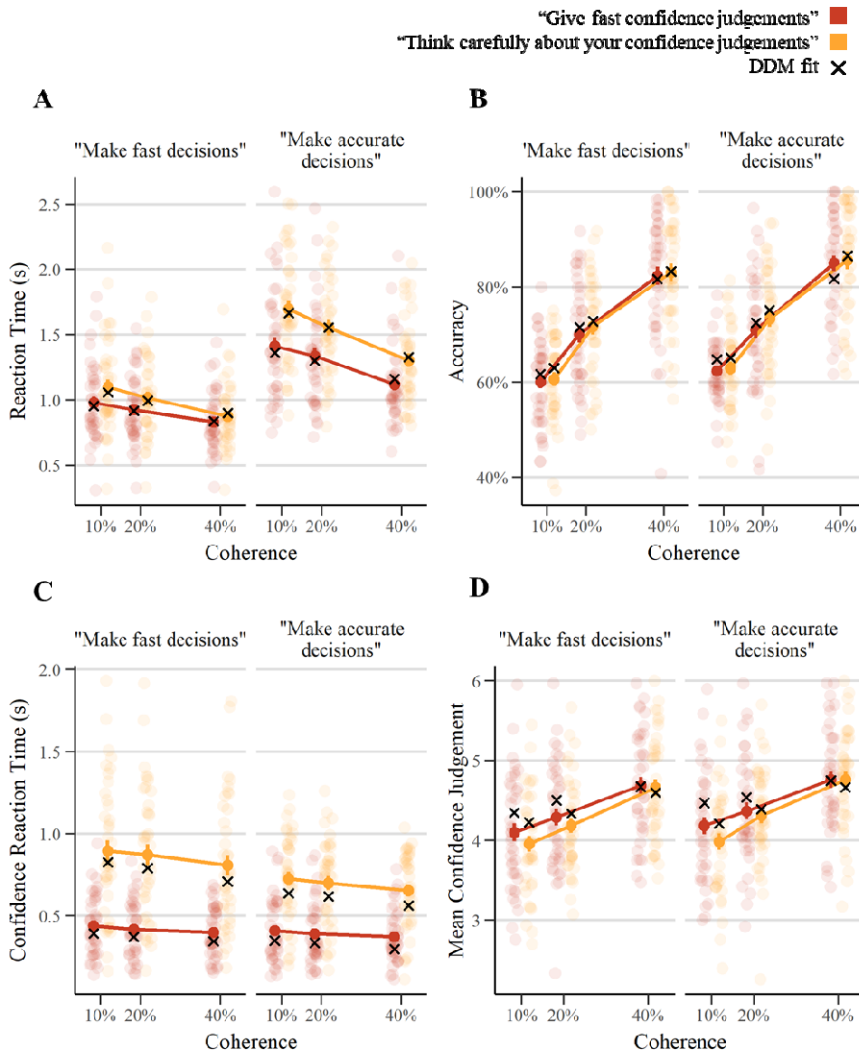

585

586 **Figure 7. The influence of choice SAT and confidence SAT on reaction times (A),**  
587 **accuracy (B), confidence RTs (C) and confidence (D) for Experiment 2. As expected, when**  
588 **participants were instructed to make fast versus accurate choices this led to fast versus slow**  
589 **choice RTs (A) and to a lesser extent to less and more accurate choices (B), respectively.**  
590 **When participants were instructed to make fast vs deliberate confidence judgments, this led**  
591 **to fast versus slow confidence RTs (C), with less pronounced effects on confidence judgments.**  
592 **Note: same conventions as in Figure 3.**

593



594 ***Extended Drift Diffusion Model Fits***

595 *Model fit*

596 Similar to Experiment 1, we again first inspected whether our model captured the  
597 patterns in the data well. In Figure 7, it can be appreciated that model predictions capture the  
598 trends seen in the behavioral data. This is further confirmed by analyzing model predictions  
599 (generated using the same number of trials as in the empirical data) in the same way as  
600 previously done with empirical data, which provided highly similar results. Most importantly,  
601 choice RTs and accuracy were both modulated by choice SAT instructions (RTs:  $\chi^2(1) =$   
602  $61.15, p < .001$ ; accuracy:  $\chi^2(1) = 7.95, p = .005$ ), as well as by confidence SAT instructions  
603 (RTs:  $\chi^2(1) = 23.62, p < .001$ ; accuracy:  $\chi^2(1) = 13.61, p = .005$ ), similar to what was found in  
604 the behavioral data. Confidence RTs and confidence were modulated by confidence SAT  
605 instructions (confidence RTs:  $\chi^2(1) = 65.47, p < .001$ ; confidence:  $\chi^2(2) = 4.88, p = .027$ ), and  
606 choice SAT instructions influenced confidence RTs,  $\chi^2(1) = 11.92, p < .001$ , but not  
607 confidence,  $p = .929$ . Note that, similar to the fits in Experiment 1, the model slightly  
608 overestimates confidence for low coherence trials. The full results for the analysis of model  
609 predictions can be found in the Supplementary Materials, Table S4. Finally, in Figure 8 it can  
610 be seen that the model captures RT and confidence RT distributions very well across the  
611 different SAT manipulations. Because Experiment 2 features six confidence levels, we  
612 additionally investigated the relation between the reported level of confidence and confidence  
613 RT. As can be seen in Figure 8D, participants tended to be faster when reporting high then  
614 low confidence, a pattern that was captured well by the computational model. Note that a  
615 model with a single parameter controlling the height of both the upper and the lower  
616 confidence boundary (cf. the model used in Experiment 1) could not capture this pattern.

617

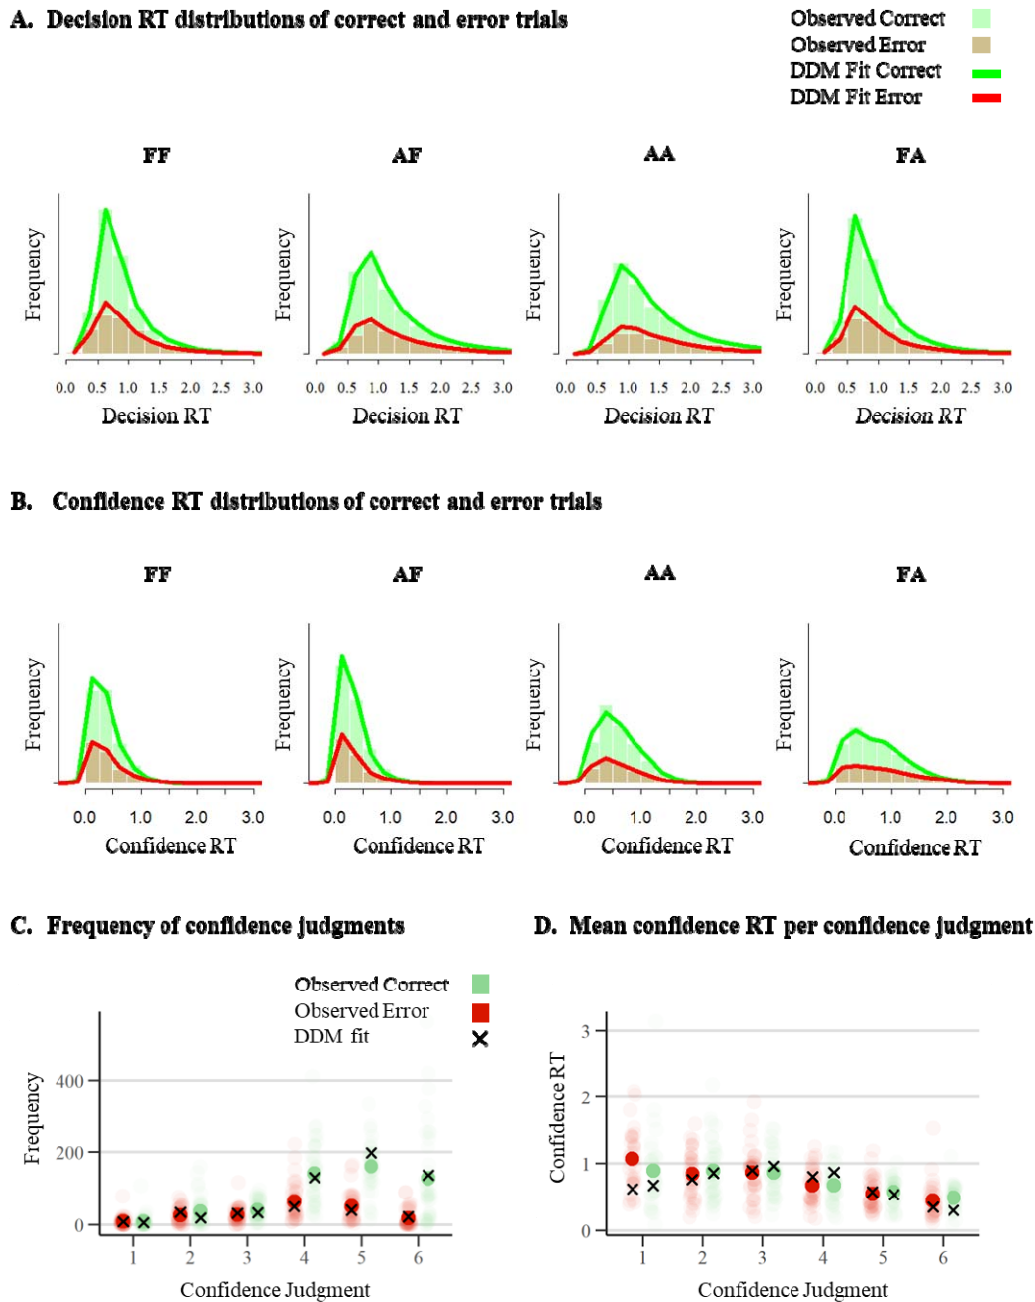

618

619 *Figure 8. Distributions of reaction times (A), confidence RTs (B) and confidence (C-D) for*  
 620 *data and model fit for Experiment 2. Inspection of the model fit reveals that our model*  
 621 *accurately captures the distributions in reaction times, confidence RTs and confidence seen*  
 622 *in the data, across all four SAT manipulations.*

623 *Model parameters*

624 Replicating the findings of Experiment 1, we again observed that estimated decision  
625 boundaries were affected by choice SAT,  $F(1, 39) = 56.27, p < .001, \eta_p^2 = .66$ . However, we  
626 also found a significant effect of the confidence SAT,  $F(1, 39) = 40.46, p < .001, \eta_p^2 = .02$ ,  
627 and an interaction between both,  $F(1, 39) = 8.28, p < .001, \eta_p^2 = .07$ . Follow-up paired *t*-tests  
628 showed that the effect of the decision RT instructions on decision boundary separation was  
629 significant both when confidence SAT was to be accurate,  $t(39) = -7.14, p < .001$ , as well as  
630 when confidence SAT was to be fast,  $t(39) = -6.69, p < .001$ . As expected, choice boundaries  
631 were modulated by choice SAT instructions (Figure 9), although the effect also seemed to  
632 scale, to a lesser extent, with confidence SAT.

633 Second, we analyzed the confidence boundaries (see Figure 9B-C). Notice that,  
634 different from Experiment 1, both confidence boundaries were allowed to vary independently  
635 and thus are analyzed separately. First, analysis of the upper confidence boundary revealed a  
636 significant effect of the confidence SAT,  $F(1, 39) = 12.80, p < .001, \eta_p^2 = .25$ , but not of the  
637 choice SAT,  $F(1, 39) = 0.08, p = .779, \eta_p^2 = .002$ , nor was there an interaction,  $F(1, 39) =$   
638  $3.01, p = .086, \eta_p^2 = .07$ . In line with our hypothesis, participants increased the upper  
639 confidence boundary when instructed to make careful confidence judgments compared to  
640 when instructed to make fast confidence judgments. Interestingly, the lower confidence  
641 boundary seemed unaffected by any of our manipulations: neither confidence SAT,  $F(1, 39)$   
642  $= 2.69, p = .109, \eta_p^2 = .06$ , nor choice SAT,  $F(1, 39) = 0.33, p = .570, \eta_p^2 = .008$ , nor the  
643 interaction between both,  $F(1, 39) = 2.96, p = .093, \eta_p^2 = .07$ , was significant.

644 Finally, we analyzed the urgency parameters controlling the slope of the confidence  
645 boundaries. For the upper confidence boundary we observed that a strong difference in  
646 urgency depending on confidence SAT,  $F(1, 39) = 22.75, p < .001, \eta_p^2 = .37$ , and to a lesser

647 extent also on choice SAT,  $F(1, 39) = 5.68$ ,  $p = .022$ ,  $\eta_p^2 = .13$ . There was no significant  
648 interaction,  $F(1, 39) = 1.51$ ,  $p = .227$ ,  $\eta_p^2 = .04$ . As can be seen in Figure 9D, instructions to  
649 make fast decisions and instructions to give fast confidence ratings led to increased urgency  
650 on the upper confidence boundary. Finally, for the lower confidence boundary we found that  
651 urgency was significantly affected by confidence SAT,  $F(1, 39) = 6.37$ ,  $p = .016$ ,  $\eta_p^2 = .14$ ,  
652 but not by choice SAT,  $F(1, 39) = 0.71$ ,  $p = .405$ ,  $\eta_p^2 = .02$ , nor was there an interaction,  $F(1,$   
653  $39) = 0.94$ ,  $p = .339$ ,  $\eta_p^2 = .02$ . When participants were instructed to make fast confidence  
654 judgments, this led to increased urgency for the lower confidence boundary (Figure 9E). All  
655 parameter estimates can be found in Table 2.

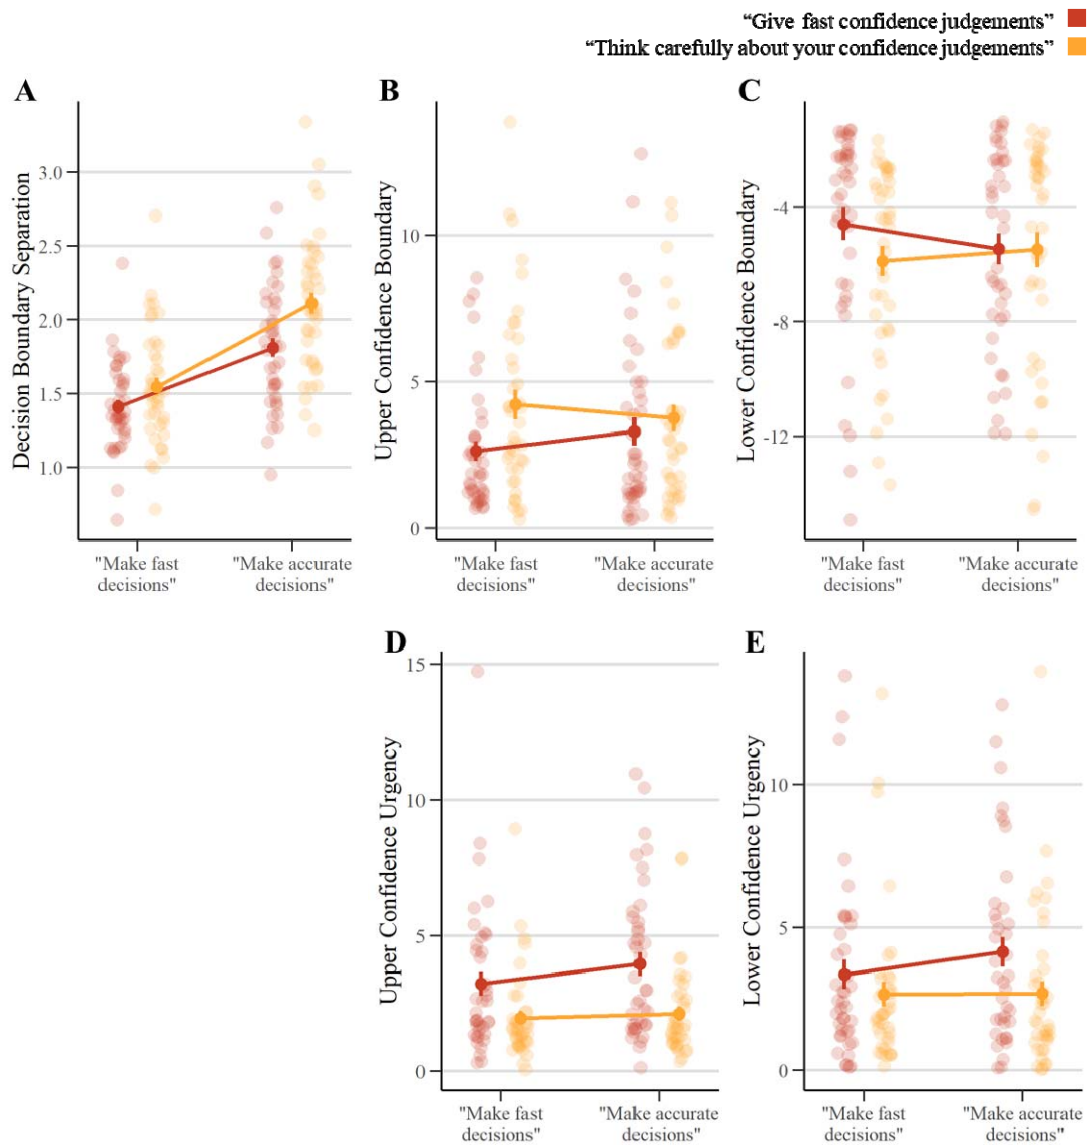

656 **Figure 9. Influence of choice and confidence SAT on decision boundaries and confidence**  
657 **boundaries in Experiment 2. Instructing participants to make fast vs accuracy choices**  
658 **influences estimated decision boundaries (A), but rarely influences upper or lower confidence**  
659 **boundaries and urgency (B-E). Instructing participants to provide fast vs careful confidence**  
660 **ratings influences the estimated lower but not upper confidence boundary (B-C) and urgency**  
661 **(D-E). Same conventions as in Figure 4.**

662

663

## Discussion

664           The human ability to estimate and report the level of confidence in their decisions has  
665 been the central topic of much recent investigations (Rahnev et al., 2022). Despite a large  
666 number of studies examining how confidence is computed, how people decide *when* to  
667 provide a confidence rating has been unresolved. This is remarkable, because the timing of  
668 confidence judgments can be highly diagnostic about the computations underlying decision  
669 confidence (Moran et al., 2015). In the current work, we propose to model the stopping rule  
670 for confidence judgments using an accumulation-to-bound mechanism similar to the one  
671 underlying decisions. Given that decision boundaries are believed to be under strategic  
672 control, this account predicts that confidence boundaries should also be under strategic  
673 control. We investigated this prediction by providing participants with different instructions  
674 regarding the tradeoff between speed and accuracy, both for decisions and for confidence  
675 judgments. In two experiments, we found that participants made faster and less accurate  
676 decisions when instructed to favor speed over accuracy, and that they made faster confidence  
677 judgments when instructed to favor speed over careful deliberation. Although the effects on  
678 average confidence were subtle or even absent, in both experiments the relation between  
679 confidence and accuracy (cf. confidence resolution) was clearly stronger when participants  
680 were more cautious in their confidence ratings. When modeling these data with an extension  
681 of the DDM with additional confidence boundaries for post-decision processing, results were  
682 as expected: SAT instructions about the decision influenced decision boundaries, while SAT  
683 instructions about confidence influenced confidence boundaries. Our findings have important  
684 consequences for the field of decision confidence, as they shed light on the importance of  
685 considering the dynamics of confidence RTs when investigating the computations underlying  
686 decision confidence.

687

**The stopping rule for confidence is under strategic control**

688 Previous work investigating the dynamics of decision confidence has mostly focused  
689 on explaining variations in decision confidence, with less focus on the speed with which  
690 confidence reports are given. The most common approach is to simply have a free parameter  
691 that controls the duration of post-decision evidence accumulation (Hellmann et al., 2021;  
692 Pleskac & Busemeyer, 2010; Yu et al., 2015). Such an implementation, however, predicts  
693 that confidence judgments will always be provided at the same post-decision latency. This  
694 prediction is at odds with the observation that confidence RTs show a right-skewed  
695 distribution that is also characteristic of decision RTs. Confidence boundaries, on the other  
696 hand, provide a plausible mechanism for the stopping rule of post-decision evidence  
697 accumulation. A notable exception to this critique is a study by Moran and colleagues (2015)  
698 who proposed a single confidence boundary that collapses slowly over time, with the level of  
699 confidence being determined by the height of the boundary at the time of crossing. Their  
700 model has three free parameters that control the termination of post-decision processing: i) a  
701 parameter that controls the initial height of the boundary, similar to  $a_2$  in our model, ii) a  
702 parameter controlling the collapse rate, similar to  $u$  in our model, and iii) a parameter  
703 controlling the time before the first collapse, for which there is no equivalent in our model.  
704 The proposal from Moran and colleagues further differs from ours because it does not  
705 consider a lower confidence boundary; the model provides a confidence rating of .5 if the  
706 collapsing confidence boundary has not been reached before it collapsed to .5. Contrastingly,  
707 in our implementation the model features both an upper and a lower confidence boundary,  
708 which can be mapped onto high versus low confidence (Experiment 1), but critically can also  
709 account for changes-of-mind by further dividing the area in between the two confidence  
710 boundaries (Experiment 2). Most importantly, although Moran and colleagues also  
711 considered speed-accuracy tradeoff in the decision, they did not investigate whether a similar

712 tradeoff exists for confidence judgments and whether this can be accounted for within their  
713 model.

714         Speed-accuracy tradeoffs can be implemented in accumulation-to-bound models via  
715 two different mechanisms: changing the overall height of the boundary or changing the  
716 collapse rate of the boundary over time. Previous work in decision making has unraveled that  
717 instructions regarding the tradeoff between speed and accuracy for the decision tend to  
718 modulate the height of the decision boundary, while not affecting urgency (Katsimpokis et  
719 al., 2020). Reversely, when providing participants with a response deadline (e.g. respond  
720 within 1s) data are best accounted for by a slowly collapsing decision boundary (Katsimpokis  
721 et al., 2020; Murphy et al., 2016). In theory, the same two mechanisms could be used to  
722 implement speed-accuracy tradeoffs for confidence judgments. However, in our experiments  
723 where confidence SAT was modulated by means of instructions, given the evidence cited  
724 above, it was expected that participants would change the height of the confidence boundary,  
725 while leaving the urgency constant. In both our experiments, there was clear evidence that  
726 participants changed the height of the confidence boundary in response to SAT instructions.  
727 Results were more mixed concerning urgency. In Experiment 1, we did not observe any  
728 difference between conditions in terms of urgency, suggesting that participants selectively  
729 changed the height of the confidence boundaries but not the slope. In Experiment 2, however,  
730 we found that in response to instructions requiring fast confidence responses, participants  
731 also increased the level of urgency for both the upper and the lower confidence boundary.  
732 Given that both experiments were identical to each other except for the number of confidence  
733 options, this suggest that complexity of the design (i.e. arbitrating between high and low  
734 confidence versus arbitrating between six fine-grained levels of confidence) is an important  
735 factor determining the specificity with which these manipulations have an effect. As already  
736 noted, however, parameter recovery for urgency was rather low, suggesting these values



737 should be interpreted with great caution. Nevertheless, in addition to further unravelling the  
738 role of design complexity, future work might also investigate the influence of providing a  
739 hard deadline for confidence judgments (e.g. you have to provide a confidence rating within  
740 1s) on the confidence boundary and associated urgency signal.

#### 741 **Characteristics of post-decision processing**

742 If confidence can be understood as an accumulation-to-bound signal, it follows that  
743 the reported level of confidence should depend on the height of the confidence boundary.  
744 Similar to how decreasing the decision boundary induces faster RTs and less accurate  
745 responses, it follows that decreasing the confidence boundaries should induce faster  
746 confidence RTs and lower confidence. Contrary to this, we did not observe a clear influence  
747 of confidence SAT on average confidence despite a clear difference in the height of the  
748 confidence boundary. As can be seen in Table 2, the extended DDM explained these data by  
749 assuming that decreasing the confidence boundaries was associated with increased post-  
750 decision drift rates. Future work might examine whether this prediction holds in post-decision  
751 centro-parietal EEG signals, which are thought to reflect the post-decision accumulation-to-  
752 bound signal (Desender et al., 2021). Although we did not find an effect on average  
753 confidence, there was a clear effect on confidence resolution: the relation between confidence  
754 and accuracy was much stronger when participants increased the confidence boundary. This  
755 finding could be anticipated, because increasing the confidence boundaries effectively  
756 requires collecting more post-decision evidence before reporting confidence, i.e. making a  
757 more informed confidence judgment. This finding adds to a number of reports showing that  
758 measures of metacognitive accuracy critically depend on the timing of confidence reports  
759 (Rosenbaum et al., 2022; Yu et al., 2015).

760 Inspection of the estimated model parameters in Table 2 reveals an interesting  
761 difference in magnitude between the non-decision component associated with the decision,  
762  $T_{er}$ , and that associated with the confidence report,  $T_{er2}$ . In line with the literature, values of  
763  $T_{er}$  are in the range of .4s - .5s on average, suggesting that this is the time participants spend  
764 on processes unrelated to the actual decision (e.g. stimulus processing, motor components).  
765 These estimates are by definition positive. Contrary to this, values of  $T_{er2}$  are very low for  
766 Experiment 1 and even negative for Experiment 2. Although negative values of  $T_{er2}$  might  
767 seem counterintuitive at first, they suggest that “post-decision” processing already initiates  
768 prior to the execution of the decision motor response (e.g., Verdonck et al., 2020). In line  
769 with this observation, there is some work that has suggested that pre-choice or peri-choice  
770 neural signals contribute to the computation of decision confidence (Feuerriegel et al., 2022;  
771 Gherman & Philiastides, 2015; Murphy et al., 2015).

## 772 **The computations underlying decision confidence**

773 Humans differ in the extent to which they can accurately judge the accuracy of their  
774 decisions via confidence judgments (i.e. metacognitive accuracy). Such variability is not  
775 without consequences, as metacognitive accuracy has been associated with political  
776 extremism (Rollwage et al., 2018), anxiety and depression (Rouault et al., 2018). Although  
777 this variability is widely accepted, there is much debate regarding the best way to quantify,  
778 so-called, metacognitive accuracy (Fleming & Lau, 2014). In recent years, there has been an  
779 increase in the number of studies investigating the computations underlying decision  
780 confidence, and accompanying proposals of novel ways to quantify metacognitive accuracy  
781 (Dayan, 2022; Desender et al., 2022; Guggenmos, 2022; Mamassian & Gardelle, 2021;  
782 Maniscalco & Lau, 2012). To our knowledge, none of these proposals takes the dynamics of  
783 confidence RTs into account. This is of critical importance, though, given our demonstration  
784 that different strategies in the reporting of decision confidence (i.e., fast versus carefully)

785 have a consistent influence on metacognitive accuracy: the relation between confidence and  
786 accuracy is stronger when participants are more cautious in their reporting of confidence.  
787 Thus, measures that do not take these dynamics into account risk to confound variability in  
788 the caution with which confidence judgments are provided with variability in genuine  
789 metacognitive accuracy. This cautionary tale bears close resemblance to a previous study in  
790 which we showed that static measures of metacognition confound caution with metacognition  
791 because they do not take the height of the decision boundary into account (Desender et al.,  
792 2022). Although this might sound very similar to the conclusion of the current work (i.e. the  
793 height of the boundary influences confidence) the underlying mechanism is very different. In  
794 our previous work, the reasoning is that impulsive decisions made with a low decision  
795 boundary lead to many premature errors that are easy to detect. Although detecting premature  
796 errors is obviously an act of metacognition, the fact that these errors are easier to detect  
797 should be taken into account when quantifying metacognition. In the current work, the  
798 reasoning is that (all) errors are easier to detect when the confidence boundaries are  
799 increased, because more evidence is accumulated to inform about the level of confidence (see  
800 also Yu et al., 2015).

## 801 **Conclusion**

802 We demonstrated that the stopping rule for confidence judgments is well described by  
803 a set of confidence boundaries that terminate post-decision processing. Importantly, just like  
804 with decision boundaries, these confidence boundaries are under strategic control, and can be  
805 increased or decreased by instructing participants to make very careful or very fast  
806 confidence judgments, respectively. When prompted to be more careful about their  
807 confidence judgments, individuals tend to be slower but metacognitively more accurate when  
808 reporting their confidence. Taken together, these results highlight the importance of taking  
809 into account the dynamics of confidence computation to unravel its underlying mechanisms.

810

### **Acknowledgments**

811

This research was supported by a starting grant from the KU Leuven (STG/20/006)

812

and the Francqui Foundation (PXF-D8830), and a CELSA grant from the KU Leuven

813

(CELSA/21/010).

814

815

## References

- 816 Balci, F., Simen, P., Niyogi, R., Saxe, A., Hughes, J. A., Holmes, P., & Cohen, J. D. (2011).  
817 Acquisition of decision making criteria: Reward rate ultimately beats accuracy.  
818 *Attention, Perception & Psychophysics*, 73(2), 640–657. [https://doi.org/10.3758/s13414-](https://doi.org/10.3758/s13414-010-0049-7)  
819 010-0049-7.Acquisition
- 820 Balsdon, T., Wyart, V., & Mamassian, P. (2020). Confidence controls perceptual evidence  
821 accumulation. *Nature Communications*, 11(1). [https://doi.org/10.1038/s41467-020-](https://doi.org/10.1038/s41467-020-15561-w)  
822 15561-w
- 823 Bates, D. M., Maechler, M., Bolker, B., & Walker, S. (2015). Fitting Linear Mixed-Effects  
824 Models Using lme4. *Journal of Statistical Software*, 67(1), 1–48.
- 825 Bogacz, R., Brown, E., Moehlis, J., Holmes, P., & Cohen, J. D. (2006). The physics of  
826 optimal decision making: A formal analysis of models of performance in two-alternative  
827 forced-choice tasks. *Psychological Review*, 113(4), 700–765.  
828 <https://doi.org/10.1037/0033-295X.113.4.700>
- 829 Bogacz, R., Hu, P. T., Holmes, P., & Cohen, J. D. (2010). Do humans produce the speed-  
830 accuracy trade-off that maximizes reward rate? *Quarterly Journal of Experimental*  
831 *Psychology*, 63(5), 863–891. <https://doi.org/10.3174/ajnr.A1256>.Functional
- 832 Bogacz, R., Wagenmakers, E.-J., Forstmann, B. U., & Nieuwenhuis, S. (2010). The neural  
833 basis of the speed-accuracy tradeoff. *Trends in Neurosciences*, 33(1), 10–16.  
834 <https://doi.org/10.1016/j.tins.2009.09.002>
- 835 Dayan, P. (2022). *Metacognitive Information Theory*. 1–14.
- 836 Desender, K., Boldt, A., & Yeung, N. (2018). Subjective confidence predicts information  
837 seeking in decision making. *Psychological Science*, 29(5), 761–778.

- 838 Desender, K., Murphy, P., Boldt, A., Verguts, T., & Yeung, N. (2019). A Postdecisional  
839 Neural Marker of Confidence Predicts Information-Seeking in Decision-Making. *The*  
840 *Journal of Neuroscience*, *39*(17), 3309–3319.
- 841 Desender, K., Ridderinkhof, K. R., & Murphy, P. R. (2021). Understanding neural signals of  
842 post- decisional performance monitoring: An integrative review. *ELife*, 1–21.
- 843 Desender, K., Vermeylen, L., & Verguts, T. (2022). Dynamic influences on static measures  
844 of metacognition. *Nature Communications*, *2022*, 1–30. [https://doi.org/10.1038/s41467-](https://doi.org/10.1038/s41467-022-31727-0)  
845 [022-31727-0](https://doi.org/10.1038/s41467-022-31727-0)
- 846 Donner, T. H., Siegel, M., Fries, P., & Engel, A. K. (2009). Buildup of Choice-Predictive  
847 Activity in Human Motor Cortex during Perceptual Decision Making. *Current Biology*,  
848 *19*(18), 1581–1585. <https://doi.org/10.1016/j.cub.2009.07.066>
- 849 Feuerriegel, D., Murphy, M., Konksi, A., Mepani, V., Sun, J., Hester, R., & Bode, S. (2022).  
850 Electrophysiological correlates of confidence differ across correct and erroneous  
851 perceptual decisions. *NeuroImage*, *259*(November 2021), 119447.  
852 <https://doi.org/10.1016/j.neuroimage.2022.119447>
- 853 Fleming, S. M., & Lau, H. C. (2014). How to measure metacognition. *Frontiers in Human*  
854 *Neuroscience*, *8*(July), 1–9. <https://doi.org/10.3389/fnhum.2014.00443>
- 855 Fleming, S. M., Weil, R. S., Nagy, Z., Dolan, R. J., & Rees, G. (2010). Relating introspective  
856 accuracy to individual differences in brain structure. *Science*, *329*(5998), 1541–1543.  
857 <https://doi.org/10.1126/science.1191883>
- 858 Folke, T., Jacobsen, C., Fleming, S. M., & De Martino, B. (2016). Explicit representation of  
859 confidence informs future value-based decisions. *Nature Human Behaviour*, *1*(0002), 1–  
860 8. <https://doi.org/10.1038/s41562-016-0002>

- 861 Fox, J., & Weinberg, S. (2019). *An R Companion to Applied Regression* (Third Edit). Sage.
- 862 Gherman, S., & Philiastides, M. G. (2015). Neural representations of confidence emerge from  
863 the process of decision formation during perceptual choices. *NeuroImage*, *106*, 134–143.  
864 <https://doi.org/10.1016/j.neuroimage.2014.11.036>
- 865 Gold, J. I., & Shadlen, M. N. (2007). The neural basis of decision making. *Annual Review of*  
866 *Neuroscience*, *30*, 535–561. <https://doi.org/10.1146/annurev.neuro.29.051605.113038>
- 867 Guggenmos, M. (2022). Reverse engineering of metacognition. *ELife*, *11*, 1–29.  
868 <https://doi.org/10.7554/eLife.75420>
- 869 Hellmann, S., Zehetleitner, M., & Rausch, M. (2021). Simultaneous modeling of choice,  
870 confidence and response time in visual perception. *BioRxiv*, 1–41.
- 871 Katsimpokis, D., Hawkins, G. E., & van Maanen, L. (2020). Not all Speed-Accuracy Trade-  
872 Off Manipulations Have the Same Psychological Effect. *Computational Brain &*  
873 *Behavior*, *3*(3), 252–268. <https://doi.org/10.1007/s42113-020-00074-y>
- 874 Mamassian, P., & Gardelle, V. De. (2021). *Modeling Perceptual Confidence and the*  
875 *Confidence Forced-Choice Paradigm*.
- 876 Maniscalco, B., & Lau, H. (2012). A signal detection theoretic approach for estimating  
877 metacognitive sensitivity from confidence ratings. *Consciousness and Cognition*, *21*(1),  
878 422–430. <https://doi.org/10.1016/j.concog.2011.09.021>
- 879 Moran, R., Teodorescu, A. R., & Usher, M. (2015). Post choice information integration as a  
880 causal determinant of confidence: Novel data and a computational account. *Cognitive*  
881 *Psychology*, *78*, 99–147. <https://doi.org/10.1016/j.cogpsych.2015.01.002>
- 882 Murphy, P. R., Boonstra, E., & Nieuwenhuis, S. (2016). Global gain modulation generates  
883 time-dependent urgency during perceptual choice in humans. *Nature Communications*,

- 884 7(May), 13526. <https://doi.org/10.1038/ncomms13526>
- 885 Murphy, P. R., Robertson, I. H., Harty, S., & O'Connell, R. G. (2015). Neural evidence  
886 accumulation persists after choice to inform metacognitive judgments. *ELife*,  
887 4(DECEMBER2015), 1–23. <https://doi.org/10.7554/eLife.11946>
- 888 O'Connell, R. G., Dockree, P. M., & Kelly, S. P. (2012). A supramodal accumulation-to-  
889 bound signal that determines perceptual decisions in humans. *Nature Neuroscience*,  
890 15(12), 1729–1735. <https://doi.org/10.1038/nn.3248>
- 891 Peirce, J., Gray, J. R., Simpson, S., MacAskill, M., Höchenberger, R., Sogo, H., Kastman, E.,  
892 & Lindeløv, J. K. (2019). PsychoPy2: Experiments in behavior made easy. *Behavior*  
893 *Research Methods*, 51(1), 195–203. <https://doi.org/10.3758/s13428-018-01193-y>
- 894 Pereira, M., Megevand, P., Tan, M. X., Chang, W., Wang, S., Rezai, A., Seeck, M., Corniola,  
895 M., Momjian, S., Bernasconi, F., Blanke, O., & Faivre, N. (2021). Evidence  
896 accumulation relates to perceptual consciousness and monitoring. *Nature*  
897 *Communications*, 12(1), 1–11. <https://doi.org/10.1038/s41467-021-23540-y>
- 898 Pereira, M., Perrin, D., & Faivre, N. (2022). A leaky evidence accumulation process for  
899 perceptual experience. *Trends in Cognitive Sciences*, 26(6), 451–461.  
900 <https://doi.org/10.1016/j.tics.2022.03.003>
- 901 Pleskac, T. J., & Busemeyer, J. R. (2010). Two-stage dynamic signal detection: A theory of  
902 choice, decision time, and confidence. *Psychological Review*, 117(3), 864–901.  
903 <https://doi.org/10.1037/a0022399>
- 904 Rafiei, F., & Rahnev, D. (2021). Qualitative speed-accuracy tradeoff effects that cannot be  
905 explained by the diffusion model under the selective influence assumption. *Scientific*  
906 *Reports*, 11(1), 1–19. <https://doi.org/10.1038/s41598-020-79765-2>



- 907 Rahnev, D., Balsdon, T., Charles, L., de Gardelle, V., Denison, R., Desender, K., Faivre, N.,  
908 Filevich, E., Fleming, S. M., Jehee, J., Lau, H., Lee, A. L. F., Locke, S. M., Mamassian,  
909 P., Odegaard, B., Peters, M., Reyes, G., Rouault, M., Sackur, J., ... Zylberberg, A.  
910 (2022). Consensus Goals in the Field of Visual Metacognition. *Perspectives on*  
911 *Psychological Science*, 174569162210756. <https://doi.org/10.1177/17456916221075615>
- 912 Ratcliff, R., & McKoon, G. (2008). The Diffusion Decision Model: Theory and Data for  
913 Two-Choice Decision Tasks. *Neural Computation*, 20, 873–922.
- 914 Resulaj, A., Kiani, R., Wolpert, D. M., & Shadlen, M. N. (2009). Changes of mind in  
915 decision-making. *Nature*, 461(7261), 263–266. <https://doi.org/10.1038/nature08275>
- 916 Rollwage, M., Dolan, R. J., & Fleming, S. M. (2018). Metacognitive Failure as a Feature of  
917 Those Holding Radical Beliefs. *Current Biology*, 28(24), 4014–4021.e8.  
918 <https://doi.org/10.1016/j.cub.2018.10.053>
- 919 Rosenbaum, D., Glickman, M., Fleming, S. M., & Usher, M. (2022). The  
920 Cognition/Metacognition Trade-Off. *Psychological Science*, 33(4), 613–628.  
921 <https://doi.org/10.1177/09567976211043428>
- 922 Rouault, M., Seow, T., Gillan, C. M., & Fleming, S. M. (2018). Psychiatric Symptom  
923 Dimensions Are Associated With Dissociable Shifts in Metacognition but Not Task  
924 Performance. *Biological Psychiatry*, 84(6), 443–451.  
925 <https://doi.org/10.1016/j.biopsych.2017.12.017>
- 926 Tuerlinckx, F., Maris, E., Ratcliff, R., & De Boeck, P. (2001). A comparison of four methods  
927 for simulating the diffusion process. *Behavior Research Methods, Instruments, and*  
928 *Computers*, 33(4), 443–456. <https://doi.org/10.3758/BF03195402>
- 929 Van Den Berg, R., Anandalingam, K., Zylberberg, A., Kiani, R., Shadlen, M. N., & Wolpert,

- 930 D. M. (2016). A common mechanism underlies changes of mind about decisions and  
931 confidence. *ELife*, 5:e12192, 1–21. <https://doi.org/10.7554/eLife.12192>
- 932 Verdonck, S., Loossens, T., & Philiastides, M. G. (2020). The Leaky Integrating Threshold  
933 and Its Impact on Evidence Accumulation Models of Choice Response Time (RT).  
934 *Psychological Review*, July. <https://doi.org/10.1037/rev0000258>
- 935 Yu, S., Pleskac, T. J., & Zeigenfuse, M. D. (2015). Dynamics of Postdecisional Processing of  
936 Confidence. *Journal of Experimental Psychology: General*, 144(2), 489–510.
- 937
- 938

939

**Supplementary Materials**

940 *Table S1. Parameter recovery for the extended DDM used in Experiment 1.*

| <i>N<sub>trials</sub> = 10.000</i> |           |          |      |          |        |      |          |
|------------------------------------|-----------|----------|------|----------|--------|------|----------|
| Model                              | Predictor | Estimate | SE   | <i>t</i> | 95% CI |      | <i>p</i> |
|                                    |           |          |      |          | LL     | UL   |          |
| <i>a</i>                           | $\beta_0$ | 0.03     | 0.06 | 0.52     | -0.09  | 0.14 | .606     |
|                                    | $\beta_1$ | 0.99     | 0.03 | 30.96    | 0.92   | 1.05 | < .001   |
| <i>a<sub>2</sub></i>               | $\beta_0$ | 0.40     | 0.31 | 1.32     | -0.22  | 1.02 | .196     |
|                                    | $\beta_1$ | 0.78     | 0.09 | 8.89     | 0.60   | 0.96 | < .001   |
| <i>u</i>                           | $\beta_0$ | 1.30     | 0.16 | 7.92     | 0.97   | 1.63 | < .001   |
|                                    | $\beta_1$ | 0.19     | 0.06 | 3.40     | 0.08   | 0.30 | .002     |
| <i>ter</i>                         | $\beta_0$ | 0.01     | 0.00 | 1.82     | -0.00  | 0.02 | .077     |
|                                    | $\beta_1$ | 0.98     | 0.01 | 116.55   | 0.96   | 1.00 | < .001   |
| <i>ter<sub>2</sub></i>             | $\beta_0$ | 0.01     | 0.01 | 0.90     | -0.01  | 0.02 | .373     |
|                                    | $\beta_1$ | 0.96     | 0.02 | 57.86    | 0.93   | 1.00 | < .001   |
| <i>v</i>                           | $\beta_0$ | -0.00    | 0.04 | -0.08    | -0.09  | 0.08 | .941     |
|                                    | $\beta_1$ | 1.02     | 0.02 | 79.41    | 0.97   | 1.06 | < .001   |
| <i>v<sub>2</sub></i>               | $\beta_0$ | 0.35     | 0.30 | 1.16     | -0.26  | 0.96 | .255     |
|                                    | $\beta_1$ | 0.84     | 0.08 | 10.28    | 0.67   | 1.00 | < .001   |
| <i>N<sub>trials</sub> = 180</i>    |           |          |      |          |        |      |          |
| Model                              | Predictor | Estimate | SE   | <i>t</i> | 95% CI |      | <i>p</i> |
|                                    |           |          |      |          | LL     | UL   |          |
| <i>a</i>                           | $\beta_0$ | 0.15     | 0.11 | 1.35     | -0.07  | 0.37 | .187     |
|                                    | $\beta_1$ | 0.91     | 0.06 | 14.93    | 0.79   | 1.04 | < .001   |

|         |           |       |      |       |       |      |        |
|---------|-----------|-------|------|-------|-------|------|--------|
| $a_2$   | $\beta_0$ | 1.22  | 0.41 | 2.95  | 0.38  | 2.05 | .005   |
|         | $\beta_1$ | 0.56  | 0.12 | 4.52  | 0.31  | 0.81 | < .001 |
| $u$     | $\beta_0$ | 1.36  | 0.17 | 7.82  | 1.01  | 1.71 | < .001 |
|         | $\beta_1$ | 0.13  | 0.05 | 2.70  | 0.03  | 0.23 | .010   |
| $ter$   | $\beta_0$ | 0.00  | 0.01 | 0.07  | -0.02 | 0.02 | .948   |
|         | $\beta_1$ | 1.00  | 0.02 | 57.54 | 0.96  | 1.03 | < .001 |
| $ter_2$ | $\beta_0$ | -0.00 | 0.01 | -0.13 | -0.02 | 0.02 | .895   |
|         | $\beta_1$ | 1.02  | 0.03 | 37.91 | 0.97  | 1.10 | < .001 |
| $v$     | $\beta_0$ | 0.12  | 0.08 | 1.49  | -0.04 | 0.29 | .144   |
|         | $\beta_1$ | 0.94  | 0.04 | 22.46 | 0.86  | 1.03 | < .001 |
| $v_2$   | $\beta_0$ | 1.14  | 0.35 | 3.27  | 0.43  | 1.85 | .002   |
|         | $\beta_1$ | 0.59  | 0.09 | 6.62  | 0.41  | 0.77 | < .001 |

---

941

942

943 Table S2. Parameter recovery for the extended DDM used in Experiment 2.

| <i>N</i> <sub>trials</sub> = 10,000 |           |          |      |          |        |      |          |
|-------------------------------------|-----------|----------|------|----------|--------|------|----------|
| Model                               | Predictor | Estimate | SE   | <i>t</i> | 95% CI |      | <i>p</i> |
|                                     |           |          |      |          | LL     | UL   |          |
| <i>a</i>                            | $\beta_0$ | 0.22     | 0.10 | 2.30     | 0.03   | 0.41 | .027     |
|                                     | $\beta_1$ | 0.86     | 0.05 | 17.77    | 0.76   | 0.96 | < .001   |
| <i>a</i> <sub>2_upper</sub>         | $\beta_0$ | 1.31     | 1.31 | 1.00     | -1.34  | 3.97 | .323     |
|                                     | $\beta_1$ | 0.72     | 0.14 | 5.31     | 0.45   | 0.99 | < .001   |
| <i>a</i> <sub>2_lower</sub>         | $\beta_0$ | 2.32     | 1.08 | 2.16     | 0.14   | 4.50 | .037     |
|                                     | $\beta_1$ | 0.69     | 0.12 | 5.95     | 0.46   | 0.93 | < .001   |
| <i>u</i> <sub>upper</sub>           | $\beta_0$ | 1.59     | 0.69 | 2.29     | 0.18   | 2.99 | .028     |
|                                     | $\beta_1$ | 0.82     | 0.08 | 9.74     | 0.65   | 1.00 | < .001   |
| <i>u</i> <sub>lower</sub>           | $\beta_0$ | 2.74     | 0.99 | 2.77     | 0.74   | 4.74 | .009     |
|                                     | $\beta_1$ | 0.65     | 0.12 | 5.52     | 0.41   | 0.89 | < .001   |
| <i>ter</i>                          | $\beta_0$ | 0.01     | 0.01 | 1.39     | -0.01  | 0.03 | .171     |
|                                     | $\beta_1$ | 0.98     | 0.02 | 56.85    | 0.95   | 1.02 | < .001   |
| <i>ter</i> <sub>2</sub>             | $\beta_0$ | -0.04    | 0.05 | -0.85    | -0.13  | 0.05 | .402     |
|                                     | $\beta_1$ | 0.78     | 0.08 | 10.21    | 0.62   | 0.93 | < .001   |
| <i>v</i>                            | $\beta_0$ | 0.07     | 0.09 | 0.87     | -0.10  | 0.25 | .393     |
|                                     | $\beta_1$ | 0.98     | 0.05 | 18.64    | 0.87   | 1.09 | < .001   |
| <i>v</i> <sub>2</sub>               | $\beta_0$ | 1.07     | 0.32 | 3.31     | 0.41   | 1.72 | .002     |
|                                     | $\beta_1$ | 0.51     | 0.08 | 6.10     | 0.34   | 0.68 | < .001   |

  

| <i>N</i> <sub>trials</sub> = 180 |           |          |    |          |        |    |          |
|----------------------------------|-----------|----------|----|----------|--------|----|----------|
| Model                            | Predictor | Estimate | SE | <i>t</i> | 95% CI |    | <i>p</i> |
|                                  |           |          |    |          | LL     | UL |          |

|                            |           |       |      |       |       |      |        |
|----------------------------|-----------|-------|------|-------|-------|------|--------|
| <i>a</i>                   | $\beta_0$ | 0.22  | 0.11 | 2.21  | 0.01  | 0.44 | .040   |
|                            | $\beta_1$ | 0.86  | 0.05 | 15.92 | 0.75  | 0.97 | < .001 |
| <i>a<sub>2_upper</sub></i> | $\beta_0$ | 3.02  | 1.16 | 2.60  | 0.67  | 5.38 | .013   |
|                            | $\beta_1$ | 0.57  | 0.12 | 4.57  | 0.32  | 0.82 | < .001 |
| <i>a<sub>2_lower</sub></i> | $\beta_0$ | 2.35  | 1.16 | 2.03  | 0.01  | 4.69 | .049   |
|                            | $\beta_1$ | 0.74  | 0.14 | 5.46  | 0.47  | 1.02 | < .001 |
| <i>u_upper</i>             | $\beta_0$ | 1.17  | 0.55 | 2.13  | 0.06  | 2.28 | .039   |
|                            | $\beta_1$ | 0.86  | 0.07 | 13.24 | 0.73  | 0.99 | < .001 |
| <i>u_lower</i>             | $\beta_0$ | 0.90  | 1.05 | 0.86  | -1.22 | 3.03 | .396   |
|                            | $\beta_1$ | 0.93  | 0.14 | 6.87  | 0.66  | 1.21 | < .001 |
| <i>ter</i>                 | $\beta_0$ | 0.02  | 0.02 | 1.25  | -0.01 | 0.05 | 0.22   |
|                            | $\beta_1$ | 0.97  | 0.03 | 34.15 | 0.91  | 1.03 | < .001 |
| <i>ter<sub>2</sub></i>     | $\beta_0$ | -0.08 | 0.04 | -1.95 | -0.16 | 0.00 | 0.058  |
|                            | $\beta_1$ | 0.77  | 0.07 | 10.64 | 0.62  | 0.92 | < .001 |
| <i>v</i>                   | $\beta_0$ | 0.01  | 0.11 | 0.07  | -0.21 | 0.23 | .942   |
|                            | $\beta_1$ | 1.00  | 0.06 | 15.45 | 0.87  | 1.13 | < .001 |
| <i>v<sub>2</sub></i>       | $\beta_0$ | 0.99  | 0.30 | 3.32  | 0.39  | 1.59 | .002   |
|                            | $\beta_1$ | 0.55  | 0.08 | 7.00  | 0.39  | 0.71 | < .001 |

944

945

946

947 *Table S3. Full results table of the analyses on the extended DDM model predictions for*  
948 *Experiment 1.*

**Experiment 1**

| <b>Dependent variable = log(RT)</b>        | <b>Chi-square</b> | <b>df</b> | <b>p value</b> |
|--------------------------------------------|-------------------|-----------|----------------|
| Choice SAT                                 | 63.52             | 1         | < .001         |
| Confidence SAT                             | 1.26              | 1         | .262           |
| Coherence                                  | 563.29            | 2         | < .001         |
| Choice SAT x confidence SAT                | 9.59              | 1         | .002           |
| Choice SAT x coherence                     | 20.11             | 2         | < .001         |
| Confidence SAT x coherence                 | 3.49              | 2         | .175           |
| Choice SAT x confidence SAT x<br>coherence | 0.95              | 2         | .622           |

---

| <b>Dependent variable = log(confidence<br/>RT)</b> |        |   |        |
|----------------------------------------------------|--------|---|--------|
| Choice SAT                                         | 0.00   | 1 | .998   |
| Confidence SAT                                     | 71.75  | 1 | < .001 |
| Coherence                                          | 140.67 | 2 | < .001 |
| Choice SAT x confidence SAT                        | 5.39   | 1 | .020   |
| Choice SAT x coherence                             | 4.28   | 2 | .117   |
| Confidence SAT x coherence                         | 2.89   | 2 | .236   |
| Choice SAT x confidence SAT x<br>coherence         | 1.95   | 2 | .377   |

---

| <b>Dependent variable = accuracy</b> |      |   |      |
|--------------------------------------|------|---|------|
| Choice SAT                           | 5.30 | 1 | .021 |
| Confidence SAT                       | 0.75 | 1 | .388 |

|                                            |       |   |        |
|--------------------------------------------|-------|---|--------|
| Coherence                                  | 85.68 | 2 | < .001 |
| Choice SAT x confidence SAT                | 0.64  | 1 | .424   |
| Choice SAT x coherence                     | 14.00 | 2 | < .001 |
| Confidence SAT x coherence                 | 2.30  | 2 | .317   |
| Choice SAT x confidence SAT x<br>coherence | 3.61  | 2 | .164   |

---

**Dependent variable = confidence**

---

|                                            |       |   |        |
|--------------------------------------------|-------|---|--------|
| Choice SAT                                 | 0.14  | 1 | .708   |
| Confidence SAT                             | 5.15  | 1 | .023   |
| Coherence                                  | 92.41 | 2 | < .001 |
| Choice SAT x confidence SAT                | 1.29  | 1 | .257   |
| Choice SAT x coherence                     | 3.11  | 2 | .211   |
| Confidence SAT x coherence                 | 0.83  | 2 | .660   |
| Choice SAT x confidence SAT x<br>coherence | 2.57  | 2 | .277   |

---

949

950



951 *Table S4. Full results table of the analyses on the extended DDM model predictions for*  
 952 *Experiment 2. Note that two interaction effects were omitted from the confidence model in the*  
 953 *behavioral data (due to inflated VIF values), and these were likewise omitted here in order to*  
 954 *be able to directly compare both fits.*

**Experiment 2**

| <b>Dependent variable = log(RT)</b>                | <b>Chi-square</b> | <b>df</b> | <b>p value</b> |
|----------------------------------------------------|-------------------|-----------|----------------|
| Choice SAT                                         | 61.15             | 1         | < .001         |
| Confidence SAT                                     | 23.62             | 1         | < .001         |
| Coherence                                          | 636.23            | 2         | < .001         |
| Choice SAT x confidence SAT                        | 6.89              | 1         | .009           |
| Choice SAT x coherence                             | 20.50             | 2         | < .001         |
| Confidence SAT x coherence                         | 8.64              | 2         | .013           |
| Choice SAT x confidence SAT x<br>coherence         | 0.63              | 2         | .731           |
| <hr/>                                              |                   |           |                |
| <b>Dependent variable = log(confidence<br/>RT)</b> |                   |           |                |
| Choice SAT                                         | 11.92             | 1         | < .001         |
| Confidence SAT                                     | 65.47             | 1         | < .001         |
| Coherence                                          | 160.92            | 2         | < .001         |
| Choice SAT x confidence SAT                        | 1.34              | 1         | .247           |
| Choice SAT x coherence                             | 1.83              | 2         | .400           |
| Confidence SAT x coherence                         | 2.50              | 2         | .287           |
| Choice SAT x confidence SAT x<br>coherence         | 1.36              | 2         | .507           |
| <hr/>                                              |                   |           |                |
| <b>Dependent variable = accuracy</b>               |                   |           |                |

|                                            |         |   |        |
|--------------------------------------------|---------|---|--------|
| Choice SAT                                 | 7.95    | 1 | .005   |
| Confidence SAT                             | 13.61   | 1 | < .001 |
| Coherence                                  | 1001.67 | 2 | < .001 |
| Choice SAT x confidence SAT                | 5.43    | 1 | .020   |
| Choice SAT x coherence                     | 4.55    | 2 | .103   |
| Confidence SAT x coherence                 | 4.21    | 2 | .122   |
| Choice SAT x confidence SAT x<br>coherence | 0.58    | 2 | .746   |

---

**Dependent variable = confidence**

---

|                                            |       |   |        |
|--------------------------------------------|-------|---|--------|
| Choice SAT                                 | 0.01  | 1 | .929   |
| Confidence SAT                             | 4.88  | 2 | .027   |
| Coherence                                  | 39.25 | 1 | < .001 |
| Choice SAT x confidence SAT                | -     | - | -      |
| Choice SAT x coherence                     | 1.44  | 2 | .486   |
| Confidence SAT x coherence                 | 10.20 | 2 | .006   |
| Choice SAT x confidence SAT x<br>coherence | -     | - | -      |

---

955

956

957
